1 **Title:** Human intestinal enteroids with inducible neurogenin-3 expression as a novel  
2 model of gut hormone secretion  
3

4 **Short Title:** *NGN3* enteroids as an enteroendocrine cell model  
5

6 **Authors:** Alexandra L. Chang-Graham<sup>1\*</sup>, Heather A. Danhof<sup>1\*</sup>, Melinda A. Engevik<sup>2,3\*</sup>,  
7 Catherine Tomaro-Duchesneau<sup>1\*</sup>, Umesh C. Karandikar<sup>1</sup>, Mary K. Estes<sup>1,4</sup>, James  
8 Versalovic<sup>2,3</sup>, Robert A. Britton<sup>1#</sup>, Joseph M. Hyser<sup>1#</sup>  
9

10 \*Authors contributed equally to this work  
11

12 <sup>1</sup>Department of Molecular Virology and Microbiology, Baylor College of Medicine

13 <sup>2</sup>Department of Pathology and Immunology, Baylor College of Medicine

14 <sup>3</sup>Department of Pathology, Texas Children's Hospital

15 <sup>4</sup>Department of Medicine, Gastroenterology and Hepatology, Baylor College of Medicine  
16

17 **# Joint Corresponding Authors:**

18 Joseph M. Hyser, Ph.D.

19 Assistant Professor

20 Alkek Center for Metagenomics and Microbiome Research

21 Department of Molecular Virology and Microbiology

22 Baylor College of Medicine

23 One Baylor Plaza, MS: BCM385

24 Tel: 713-798-4514

25 Fax: 713-798-3586

26 [Joseph.hyser@bcm.edu](mailto:Joseph.hyser@bcm.edu)  
27

28 Robert A. Britton, Ph.D.

29 Professor

30 Alkek Center for Metagenomics and Microbiome Research

31 Department of Molecular Virology and Microbiology

32 Baylor College of Medicine

33 One Baylor Plaza, MS: BCM385

34 Tel: 713-798-6189

35 Fax: 713-798-3586

36 [Robert.Britton@bcm.edu](mailto:Robert.Britton@bcm.edu)  
37

38 **Grant Support:**

39 Funding support includes: NIH F30DK112563 (A.C.G), Fonds de recherche santé  
40 Québec (C.T.D.), NIH U01CA170930 (J.V.), NIH R01DK103759 (R.A.B), NIH U19  
41 AI116497, R01 AI080656 (M.K.E.), and NIH R03DK110270 and Baylor College of  
42 Medicine (BCM) Seed Funding (J.M.H.). This project was also supported in part by the  
43 NIH PHS grant P30 DK056338 for the Texas Medical Center Digestive Diseases  
44 Center. Additional funding support for the BCM Integrated Microscopy Core includes the  
45 NIH (DK56338, CA125123), CPRIT (RP150578, RP170719), the Dan L. Duncan

46 Comprehensive Cancer Center, and the John S. Dunn Gulf Coast Consortium for  
47 Chemical Genomics.

48

49 **Disclosures:**

50 No conflicts of interest exist.

51

52 **Author Contributions:**

53 Concept and design (ACG, HAD, MAE, CTD, UCK, MKE, RAB, JMH); intellectual  
54 contribution (ACG, HAD, MAE, CTD, UCK, MKE, JV, RAB, JMH); data acquisition  
55 (ACG, HAD, MAE, CTD, UCK); data analysis, statistical analysis, and interpretation  
56 (ACG, HAD, MAE, CTD, UCK); drafting and editing manuscript (ACG, HAD, MAE,  
57 JMH); obtained funding (MKE, JV, RAB, JMH)

58

59 **Abbreviations:** neurogenin-3 (NGN3), tetracycline (tet), doxycycline (dox),  
60 gastrointestinal (GI), human intestinal enteroids (HIEs), human intestinal organoids  
61 (HIOs), short chain fatty acids (SCFAs), chromogranin A (ChgA), pancreatic polypeptide  
62 (PP), glucose-dependent insulintropic peptide (GIP), glucagon-like peptide-1 (GLP-1),  
63 peptide YY (PYY), monocyte chemoattractant protein-1 (MCP-1), tryptophan  
64 hydroxylase (Tph1), villin (VIL1), sucrase isomaltase (SI), rotavirus (RV), hour (hr),  
65 hours post infection (hpi), reverse transcriptase – quantitative polymerase chain  
66 reaction (RT-qPCR), immunofluorescence (IF), hematoxylin and eosin (H&E), two-  
67 dimensional (2D), three-dimensional (3D), complete medium without growth factors  
68 (CMGF-), complete media with growth factors (CMGF+), high Wnt complete media with  
69 growth factors (hW-CMGF+)

70

71 **Word Count:** 4368

72 **Synopsis:** Enteroendocrine cells have low abundance but exert widespread effects on  
73 gastrointestinal physiology. We engineered human intestinal enteroids with inducible  
74 expression of neurogenin-3, resulting in increased enteroendocrine cells and facilitating  
75 investigations of host responses to the dynamic intestinal environment.

76

77 **Abstract**

78 Background: Enteroendocrine cells (EECs) are specialized epithelial cells that produce  
79 molecules vital for intestinal homeostasis, but due to their limited numbers, in-depth  
80 functional studies have remained challenging. Human intestinal enteroids (HIEs) that  
81 are derived from intestinal crypt stem cells are a biologically relevant *in vitro* model of  
82 the intestinal epithelium. HIEs contain all intestinal epithelial cell types; however, like the  
83 intestine, HIEs spontaneously produce few EECs, which limits their study.

84

85 Methods: To increase the number of EECs in HIEs, we used lentivirus transduction to  
86 stably engineer jejunal HIEs with doxycycline-inducible expression of neurogenin-3  
87 (*NGN3*), a transcription factor that drives EEC differentiation (tet*NGN3*-HIEs). We  
88 examined the impact of *NGN3* induction on EECs by quantifying the increase in the  
89 enterochromaffin cells and other EEC subtypes. We functionally assessed secretion of  
90 serotonin and EEC hormones in response to norepinephrine and rotavirus infection.

91

92 Results: Treating tet*NGN3*-HIEs with doxycycline induced a dose-dependent increase  
93 of chromogranin A (ChgA)-positive and serotonin-positive cells, demonstrating  
94 increased enterochromaffin cell differentiation. Despite increased ChgA-positive cells,  
95 other differentiated cell types of the epithelium remained largely unchanged by gene  
96 expression and immunostaining. RNA sequencing of doxycycline-induced tet*NGN3*-  
97 HIEs identified increased expression of key hormones and enzymes associated with  
98 several other EEC subtypes. Doxycycline-induced tet*NGN3*-HIEs secreted serotonin,  
99 monocyte chemoattractant protein-1, glucose-dependent insulinotropic peptide, peptide

100 YY, and ghrelin in response to norepinephrine and rotavirus infection, further supporting  
101 the presence of multiple EEC types.

102

103 Conclusions: We have combined HIEs and inducible-*NGN3* expression to establish a  
104 flexible *in vitro* model system for functional studies of EECs in enteroids and advance  
105 the molecular and physiological investigation of EECs.

106

107 Keywords: enteroendocrine cell; enteroid; serotonin

108

## 109 **Introduction**

110           The gastrointestinal (GI) epithelium is the largest sensory interface between host  
111 and environment and must both detect and communicate luminal contents to the host  
112 [1]. The GI lumen is a complex mixture of dietary nutrients and their breakdown  
113 products, microorganisms and their metabolites, as well as irritants, toxins, and drugs.  
114 Microorganisms in particular create a dynamic ecosystem in the GI lumen with both  
115 beneficial and detrimental effects. For example, the gut microbiome is important for  
116 degradation of complex carbohydrates and polysaccharides into short chain fatty acids  
117 (SCFAs) such as acetate, butyrate, and propionate that can be used as nutrients by the  
118 host or other microbes. SCFAs also modulate a variety of important physiological  
119 effects such as inflammation and gut motility [2]. By contrast, pathogenic  
120 microorganisms invade the epithelium or produce toxins that threaten the GI epithelial  
121 barrier and thus necessitate activation of host defenses. Therefore, integrating signals  
122 from luminal stimuli to the host for coordinated and appropriate physiological responses  
123 is complex, which has complicated efforts to study the molecular mechanisms  
124 governing these processes.

125           Microbiome-to-epithelium communication is multifaceted and includes receptors  
126 on various cell types, including enterocytes, goblet cells, Paneth cells and stem cells.  
127 Recent evidence shows that enteroendocrine cells are one of the most important  
128 mediators of communication between the GI lumen and host [3]. Enteroendocrine cells  
129 (EECs) are a rare cell lineage found throughout the length of the GI tract (<1% of GI  
130 epithelial cells), yet they have a significant impact on human physiology [4-6]. In  
131 response to host, microbial, and environmental stimuli, subtypes of EECs synthesize

132 and secrete hormones including gastrin (G cells), somatostatin (D cells),  
133 enteroglucagon/peptide YY (PYY) and glucagon-like peptide 1 (GLP-1) (L cells),  
134 neurotensin (N cells), pro- $\gamma$ -melanocyte-stimulating hormone (MSH) cells, and serotonin  
135 (enterochromaffin cells) [7-9]. The broad array of enteroendocrine cell types reflects the  
136 diversity of critical physiological functions including the coordination of both local and  
137 systemic responses by the endocrine and nervous systems to the stimuli present in the  
138 lumen. Enterochromaffin cells are the most common EEC subtype, comprising ~40% of  
139 the EECs. These cells synthesize and secrete the neurotransmitter serotonin in  
140 response to various physiological stimuli, including microbial metabolites, irritants,  
141 toxins, and infection [10-12]. Given the importance of serotonin in mammalian  
142 physiology and greater abundance among EECs, many studies focus on  
143 enterochromaffin cells, but due in part to their rarity, how other EEC subtypes function in  
144 the context of the gut environment remains less well studied.

145         Studying the interaction of EECs and stimuli in the GI lumen has been  
146 challenging due to the limited numbers of these cells in the intestinal epithelium and the  
147 lack of appropriate non-cancer derived *in vitro* models. Generation of enteroids is a  
148 recent technology that has revolutionized the study of intestinal epithelial cells. They  
149 have been generated from several mammalian hosts, including mouse and human, and  
150 recapitulate the GI physiology of the donor species [13-16]. This complex epithelial  
151 culture system is derived from adult stem cells isolated from intestinal tissue or biopsy  
152 samples that can be maintained and expanded in culture as an *in vitro* model system  
153 [13-15, 17-21]. Thus, enteroids offer a promising new tool to study non-transformed,  
154 non-cancerous human EECs in an *in vitro* culture system [17].

155 Previous studies have established that neurogenin 3 (Ngn3) is a key transcription  
156 factor for EEC differentiation [22-36]. Consistent with the role of Ngn3 in EEC fate,  
157 overexpression of *NGN3* in multiple systems has been shown to increase EEC numbers  
158 [37, 38]. *In vitro*, adenoviral-based *NGN3* overexpression in neonatal mouse jejunal  
159 intestinal spheres induced a threefold increase in the number of chromogranin A  
160 (ChgA)-positive EECs [39]. In human intestinal organoids (HIOs) derived from  
161 pluripotent stem cells, overexpression of *NGN3* by an adenoviral vector or tetracycline-  
162 inducible lentiviral vector also increased ChgA-positive EECs [29, 40]. In this study, we  
163 generated a new model system using jejunal human intestinal enteroids (HIEs)  
164 engineered to overexpress *NGN3* from a tetracycline-inducible promoter (*tetNGN3*) to  
165 drive EEC differentiation. These *tetNGN3*-HIEs exhibit a doxycycline dose-dependent  
166 increase in ChgA expression in both 3-dimensional culture and as 2-dimensional  
167 monolayers, as well as upregulation of markers for multiple EEC subtypes, including  
168 enterochromaffin cells, L cells and K cells. In response to microbial and host stimuli,  
169 these induced EECs secreted serotonin, monocyte chemoattractant protein-1 (MCP-1),  
170 glucose-dependent insulintropic peptide (GIP), peptide YY (PYY), and ghrelin. Thus,  
171 *tetNGN3*-HIEs are a new and physiologically relevant model system to study EEC-  
172 based communication pathways in response to both microbial and host stimuli.  
173



## 174 **Results**

### 175 ***Creation and propagation of inducible tetNGN3-HIEs***

176 Since host-microbe interactions via EECs has a profound impact on host  
177 physiology, we sought to develop a new model for screening, identification, and testing  
178 of microbe-induced EEC responses. Due to the low abundance of EECs within intestinal  
179 tissue and human intestinal enteroids (HIEs), we aimed to increase EEC abundance  
180 through inducible overexpression of *NGN3* using lentivirus transduction to introduce a  
181 doxycycline-inducible *NGN3* expression cassette into an HIE [72, 73]. In preparation for  
182 transduction, jejunal HIEs were grown high Wnt complete media with growth factors  
183 (hW-CMGF+) to enrich the stem cell population, which was evidenced by the majority of  
184 HIEs exhibiting a cystic morphology with multiple small buds (**Fig. 1A, left panel**).  
185 Growth in high Wnt media was important for increasing the success rate of the  
186 transduction. After lentivirus transduction, geneticin selection initially increased  
187 sloughing of dead cells from the HIEs, and full selection of transduced tet*NGN3*-HIEs  
188 occurred after ~5 weeks (**Fig. 1A, right panel**).

189 To confirm the ability of *NGN3* to drive EEC differentiation we used  
190 immunofluorescence (IF) staining for chromogranin A (ChgA) as a marker of endocrine  
191 cells, which are often used to assess increases in EEC numbers upon *NGN3*  
192 overexpression [29, 39, 40]. First, the number of ChgA-positive cells present in the  
193 tet*NGN3*-HIEs after induction with 1  $\mu$ g/mL doxycycline was assessed (**Fig. 1B**). In  
194 paraffin-embedded slices of 3D tet*NGN3*-HIE cultures, we observed abundant ChgA-  
195 positive cells in both apical and basolateral areas of cells (**Fig 1B**). In contrast to the  
196 doxycycline-induced tet*NGN3*-HIEs, very few ChgA-positive cells were observed in the

197 absence of doxycycline (**Fig. 1C, left panel**). However, induction of *tetNGN3* increased  
198 the number of ChgA-positive cells in a doxycycline dose-dependent manner (**Fig. 1C**). A  
199 similar doxycycline dose-dependent increase in ChgA-positive cells was observed in  
200 two-dimensional (2D) flat monolayers (**Fig. 1D**). Of note, the ChgA-positive cells in both  
201 3D and 2D formats exhibited the polygonal cell shape typically associated with  
202 enterochromaffin cells [41].

203 Using image analysis software, we quantified the abundance of ChgA-positive  
204 cells from the different doxycycline-induction conditions above. In the absence of  
205 doxycycline, both 3D and monolayer *tetNGN3*-HIEs exhibited few to no ChgA-positive  
206 cells. In contrast, addition of 0.1  $\mu\text{g/mL}$  and 1  $\mu\text{g/mL}$  doxycycline to 3D *tetNGN3*-HIEs  
207 resulted in a dose-dependent increase in the number of ChgA-positive cells ( $p < 0.0001$ )  
208 (**Fig. 2A, left panel**). This pattern was also observed in 2D flat *tetNGN3*-HIEs  
209 monolayers, with doxycycline concentrations at or below 0.01  $\mu\text{g/mL}$  exhibiting ~0.4%  
210 ChgA-positive cells, similar to the non-induced *tetNGN3*-HIEs (**Fig. 2A, right panel**).  
211 Treatment of *tetNGN3*-HIEs with 0.1  $\mu\text{g/mL}$  doxycycline resulted in ~5% ChgA-positive  
212 cells, about a 12-fold increase, while addition of 1  $\mu\text{g/mL}$  doxycycline resulted in ~40%  
213 ChgA-positive cells (**Fig. 2A right panel**). Thus, induction of *tetNGN3* correlated with an  
214 increase in ChgA-positive cells, supporting our premise that overexpression of *NGN3*  
215 would drive EEC differentiation in HIEs. The *tetNGN3*-HIEs have stably maintained the  
216 *tetNGN3* transgene and exhibited the doxycycline-induced increase in ChgA-positive  
217 cells (detected by IF staining) for >10 months. Additionally, *tetNGN3*-HIEs maintained  
218 inducible expression after storage in liquid nitrogen (data not shown).

219

## 220 ***Induction of enteroendocrine cell differentiation***

221 To confirm that doxycycline treatment alone did not induce EEC differentiation in  
222 HIEs, we measured mRNA transcript levels after treating the parental (non-transduced)  
223 jejunum HIEs with 0 or 1 µg/mL doxycycline. We quantitated the mRNA levels of the  
224 enterochromaffin cell markers *CHGA* and *TPH1* and the enterocyte marker villin (VIL1)  
225 by quantitative polymerase chain reaction (qPCR) (**Fig. 2B**). No significant difference  
226 between treatment groups was present in any of the cell markers examined, indicating  
227 that doxycycline alone does not impact EEC differentiation in the absence of *NGN3*  
228 expression (**Fig. 2B**).

229 In a complementary approach to demonstrate that induction of tet*NGN3*  
230 increases EEC differentiation, we correlated the increase in *NGN3* and *CHGA*  
231 transcripts in tet*NGN3*-HIEs treated with 0, 0.1, and 1 µg/mL doxycycline, and  
232 compared gene expression in the three different HIE formats (i.e., 3D culture, flat  
233 monolayers, and transwell monolayers), summarized in **Table 3**. Overall, we observed a  
234 doxycycline dose-dependent increase in both *NGN3* and *CHGA* expression in all three  
235 formats of the tet*NGN3*-HIEs. Treatment with 1 µg/mL doxycycline significantly  
236 increased both enterochromaffin cell markers in all three culture formats (**Fig. 2C**).  
237 However, there were some notable differences in the expression profiles between each  
238 type of HIE format. Treating 3D tet*NGN3*-HIEs with 0.1 µg/mL doxycycline induced  
239 *NGN3* and *CHGA* expression to a lesser degree than 0.1 µg/mL doxycycline treatment  
240 of flat or transwell monolayers (**Fig. 2C**), which may be due to limited penetrance of  
241 doxycycline through the Matrigel used for 3D cultures. Further, transwell monolayers  
242 treated with 0.1 µg/mL doxycycline have a greater fold induction of *NGN3* and *CHGA*

243 expression than in flat monolayers (**Fig. 2C**). This difference may be the result of  
244 greater cell surface contact with the media in transwell monolayers, which have both  
245 apical and basolateral access to the media, than in flat monolayers. Together, these  
246 results demonstrate that the inducible tet*NGN3*-HIEs are a tunable and versatile system  
247 for increased differentiation of enterochromaffin cells in each of the HIE culture formats.

248

### 249 ***Characterization of epithelial cell types present in tetNGN3-HIEs***

250 To assess the impact of *NGN3* overexpression on HIE morphology, we treated  
251 3D and transwell monolayer preparations of the tet*NGN3*-HIEs with 0, 0.1, and 1 µg/mL  
252 doxycycline (**Fig. 3A, B**). Hematoxylin and eosin (H&E) staining of 3D (**Fig. 3A**) and  
253 transwell monolayers (**Fig. 3B**) showed only minor alterations in morphology upon  
254 induction with 0.1 µg/mL doxycycline, primarily larger nuclei and increased cell height  
255 (**Fig. 3B, middle panel**). Strong induction with 1 µg/mL doxycycline resulted in more  
256 significant morphological changes. In the 3D tet*NGN3*-HIEs, there was a marked  
257 increase in luminal (apical) cell debris (**Fig. 3A, right panel**), and in transwell  
258 monolayers we observed larger nuclei and a discontinuous apical membrane with  
259 increased shedding of cellular material (**Fig. 3B, right panel**). Further, we examined the  
260 ultrastructure of the tet*NGN3*-HIEs using transmission electron microscopy of 3D HIEs  
261 treated for 5 days with 0 or 1 µg/mL doxycycline in differentiation media (**Fig. 3C and**  
262 **3D**). Most cells observed in the 0 µg/mL doxycycline-treated tet*NGN3*-HIEs had the  
263 basolateral nuclei, apical microvilli, and brush border characteristic of enterocytes (**Fig.**  
264 **3C**). As expected, in tet*NGN3*-HIEs treated with 1 µg/mL doxycycline, we observed

265 more EECs based on greater numbers of cells with electron-dense granules, including  
266 cells open to the lumen of the 3D enteroid (**Fig. 3D**).

267 'Differentiation' of HIEs by exclusion of Wnt3a from the culture media drives  
268 maturation of the different epithelial cell types [14, 17, 21, 42, 43], so we next used RT-  
269 qPCR to determine whether *NGN3* induction altered expression of cell lineage-specific  
270 marker genes in differentiated HIEs. For this we tested markers for Paneth cells (*LYSZ*),  
271 crypt base columnar stem cells (*LGR5*), goblet cells (*MUC2*), and enterocytes [villin  
272 (*VIL1*) and sucrase isomaltase (*SI*)] (**Table 2**). First, we observed no difference in  
273 differentiation marker expression between the parental HIE line and the uninduced  
274 tet*NGN3*-HIEs, indicating that lentivirus transduction itself did not cause alterations in  
275 HIE cell differentiation (data not shown). In 3D tet*NGN3*-HIEs (**Fig. 4A, left panel**),  
276 doxycycline induction caused no significant changes in cell lineage-specific gene  
277 expression, and while *SI* exhibited a trend for lower levels, expression of *VIL1* remained  
278 unchanged. Further, in tet*NGN3*-HIE flat monolayers the overall gene expression levels  
279 were similar to the 3D tet*NGN3*-HIEs and no significant changes in lineage-specific  
280 marker genes were observed (**Fig. 4A, right panel**).

281 To gain further insight into the broader impacts of *NGN3* overexpression, we  
282 performed global transcriptional analysis of mRNA (RNA-seq) isolated from tet*NGN3*-  
283 HIEs cultured in transwell format in the absence or presence of 1 µg/mL doxycycline for  
284 5 days. Comparison of the expression levels across 31 genes indicated a dramatic  
285 increase in the abundance of *NGN3* and *CHGA* transcripts (**Fig. 4B**) However, there  
286 was relatively little change in genes involved in tight junctions, or markers of Paneth,  
287 goblet or tuft cell lineages. In contrast, all markers of enterocytes decreased modestly,

288 with log<sub>2</sub> fold changes of less than 2 (**Fig. 4B, Table 4**). Similar to the H&E staining  
289 (**Fig. 3**), immunofluorescence microscopy of 3D cultures and transwell monolayers  
290 demonstrated that the tet*NGN3*-HIEs maintained a polarized cell layer upon doxycycline  
291 treatment, as demonstrated by apical localization of phospho-ezrin, SI, and sodium-  
292 glucose transporter 1 (**Fig. 4C-E**). Finally, we examined whether *NGN3* overexpression  
293 altered goblet cell numbers in the tet*NGN3*-HIEs. Immunostaining for Muc2 in non-  
294 induced or induced (1 µg/mL doxycycline) 3D tet*NGN3*-HIEs showed that induction of  
295 *NGN3* expression did not decrease the number of Muc2-positive cells (**Fig. 4F**), which  
296 is consistent with the lack of changes in *MUC2* gene expression between 0 and 1 µg/mL  
297 doxycycline treatments found by qPCR and RNA-seq analyses (**Fig. 4A,B**). Taken  
298 together, inducible *NGN3* overexpression significantly increases the EEC population,  
299 but this does not substantially change the transcript levels of other differentiated cell  
300 types or the morphological characteristics of these enteroids.

301

### 302 ***tetNGN3-HIEs secrete serotonin in response to physiological stimuli***

303 The enterochromaffin cell subtype is an important source of serotonin-mediated  
304 signaling, which has multiple effects on intestinal homeostasis, and disruptions in  
305 serotonin signaling have been shown to contribute to several GI disorders [44-50].  
306 Serotonin is synthesized via the conversion of L-tryptophan by the enzyme tryptophan  
307 hydroxylase (Tph1), and stored in secretory vesicles for stimulus-driven secretion [51].  
308 Therefore, we tested if induction of *NGN3* overexpression in HIEs increased serotonin  
309 response to biological stimuli *in vitro*. We confirmed that both *CHGA* and *TPH1* gene  
310 expression are upregulated in doxycycline-induced tet*NGN3*-HIEs (**Fig. 5A**). Further,

311 we showed that doxycycline induction (1  $\mu\text{g}/\text{mL}$ ) increased the number of ChgA and  
312 serotonin double-positive cells by fluorescence of 3D tet*NGN3*-HIEs (**Fig. 5B**). These  
313 indicate an increase in the number of serotonin-secreting enterochromaffin cells.

314 We next characterized the physiological response of the tet*NGN3*-HIE-derived  
315 enterochromaffin cells to stimuli previously shown to elicit serotonin secretion by other  
316 enterochromaffin model systems [52, 53]. A previous study found that mouse  
317 enterochromaffin cells secrete serotonin in response to norepinephrine and isovalerate  
318 [52]. Norepinephrine is a neurotransmitter important for communication between the gut  
319 and the enteric nervous system, particularly in response to infection or injury [54].  
320 Isovalerate is a fatty acid metabolite likely generated by the microbiome, particularly by  
321 amino acid fermenting bacteria such as from the Clostridial, Bacillus, Lactobacillus,  
322 Streptococcus and Proteobacteria groups [55]. We quantified serotonin secretion into  
323 the media of flat monolayers of tet*NGN3*-HIEs, induced with 0 or 1  $\mu\text{g}/\text{mL}$  doxycycline,  
324 and treated with different concentrations of norepinephrine or isovalerate. After  
325 stimulation with these agonists, supernatants were collected to measure serotonin  
326 secretion using a serotonin ELISA. We found that norepinephrine treatment of induced  
327 tet*NGN3*-HIEs stimulated a significant and dose-dependent increase in serotonin  
328 secretion, but no increase in serotonin secretion was observed from the non-induced  
329 tet*NGN3*-HIEs ( $p < 0.05$ ,  $p < 0.0001$ ) (**Fig. 5C**). Interestingly, treatment with up to 500  $\mu\text{M}$   
330 isovalerate did not stimulate measurable serotonin secretion in either the non-induced  
331 or the doxycycline-induced tet*NGN3*-HIEs (**Fig. 5D**).

332 To determine if our model is responsive to other microbial stimuli, we tested  
333 whether rotavirus (RV) infection, a common diarrhea-causing enteric virus, stimulates

334 serotonin secretion from tet*NGN3*-HIEs. Previous studies in both human  
335 enterochromaffin cell lines, and in mice found that RV infects both enterocytes and  
336 ChgA- and serotonin-positive enterochromaffin cells and stimulates serotonin secretion  
337 [12, 53]. Furthermore, HIEs are a new model for RV infection and enterochromaffin cells  
338 in HIEs support RV infection; however, whether RV infection stimulates serotonin  
339 secretion in HIEs has not been tested [13, 14]. Flat monolayers of tet*NGN3*-HIE induced  
340 with 0 or 1  $\mu\text{g}/\text{mL}$  doxycycline were infected with trypsin-activated human RV (strain Ito,  
341 G3[P8]). Supernatants were harvested at 24 hr post-infection to measure serotonin  
342 secretion. RV infection significantly increased serotonin secretion in both the non-  
343 induced and doxycycline-induced tet*NGN3*-HIEs compared to mock-infected tet*NGN3*-  
344 HIEs ( $p < 0.0001$ ) (**Fig. 5E**). Most notably, the serotonin response to RV infection was  
345 significantly greater from the doxycycline-induced tet*NGN3*-HIEs, demonstrating that  
346 the tet*NGN3*-HIEs amplify observed enterochromaffin cell responses (**Fig. 5E**).

347 The ability of RV to stimulate serotonin secretion in tet*NGN3*-HIEs was also  
348 tested in transwell monolayers that were induced with 0.1  $\mu\text{g}/\text{mL}$  doxycycline in  
349 differentiation media for 5 days. In transwell monolayers, we were able to test serotonin  
350 secretion both apically and basolaterally after infection with RV at 1 hpi, 12 hpi, and 24  
351 hpi (**Fig. 5F and 5G**). At 12 hpi, RV-infected transwell monolayers secreted significantly  
352 more serotonin into the basolateral compartment than mock-infected monolayers  
353 ( $p < 0.05$ ) (**Fig. 5G**), while apical serotonin secretion was not significantly increased (**Fig.**  
354 **5F**). By 24 hpi, there was significantly more serotonin secretion both apically and  
355 basolaterally from RV-infected than mock-infected monolayers ( $p < 0.01$ ) (**Fig. 5G and**  
356 **5F**). These data indicate that serotonin is primarily secreted basolaterally from the



357 monolayer, particularly early in RV infection, but both basolateral and apical serotonin  
358 secretion is detected later in infection. Finally we confirmed that the doxycycline-  
359 induced enterochromaffin cells are susceptible to RV infection by immunofluorescence  
360 confocal microscopy. At 12 hpi, the tet*NGN3*-HIE transwell monolayers were fix and  
361 stained for ChgA and the RV non-structural protein 2 (NSP2), which shows co-  
362 immunostaining of cells for ChgA and NSP2 (**Fig. 5H**) that is consistent with the known  
363 susceptibility of enterochromaffin cells to RV infection [12, 13, 53].

364

### 365 ***tetNGN3-HIEs differentiate into multiple enteroendocrine cell types***

366 To identify other EEC types that are present in the induced tet*NGN3*-HIEs, we  
367 examined the RNA-seq data from doxycycline-induced tet*NGN3*-HIEs for expression of  
368 marker genes predominantly expressed in the seven EEC subtypes, as well as marker  
369 genes for enterochromaffin cells. We found that expression of each of the EEC marker  
370 genes was upregulated to varying degrees (**Fig. 6A, Table 4**), suggesting that  
371 doxycycline treatment of the tet*NGN3*-HIEs could induce the other EEC cell types in  
372 addition to enterochromaffin cells. These results are supported by positive  
373 immunostaining for GLP-1 distinct from ChgA-positive cells in tet*NGN3*-HIE monolayers  
374 when induced with 1 µg/mL doxycycline (**Fig. 6B**). To test if doxycycline-induced  
375 tet*NGN3*-HIEs functionally amplified the physiological response of these EEC subtypes,  
376 we quantified gut hormones known to be secreted by different EEC types after  
377 stimulation with norepinephrine or infection with RV, as in the experiments above (**Fig.**  
378 **6C-F**). We did not detect secreted hormones from uninduced tet*NGN3*-HIE monolayers  
379 after stimulation with norepinephrine or RV infection, with the exception of monocyte

380 chemoattractant protein-1 (MCP-1), which is also known to be produced by enterocytes  
381 (**Fig. 6C and 6D**). In contrast, tet*NGN3*-HIE monolayers induced with 1 µg/mL  
382 doxycycline exhibited increased secretion of MCP-1 and glucose-dependent  
383 insulintropic peptide (GIP, from K cells) in response to 5 µM norepinephrine (**Fig. 6B**).  
384 Of note, norepinephrine did not stimulate PYY (L cells) or ghrelin (P/D1 cells). Further,  
385 in response to RV infection, the induced tet*NGN3*-HIEs secreted large quantities of  
386 MCP-1 and GIP and moderate amounts of PYY and ghrelin (**Fig. 6E**), and this response  
387 was absent in uninduced tet*NGN3* HIEs (**Fig. 6D**). Norepinephrine and RV infection did  
388 not stimulate PP (pancreatic polypeptide; PP cells also known as F cells) secretion,  
389 which is primarily produced in pancreatic cells and only rarely in the intestine [56].  
390 Together, these data show that our tet*NGN3*-HIE model drives the differentiation of  
391 multiple functional EEC subtypes that secrete gut hormones in response to biologically  
392 relevant stimuli.

393

394

## 395 **Discussion**

396           Limitations of the available human EEC systems have made it challenging to  
397 comprehensively study the molecular physiology of EECs. In this study, we engineered  
398 a HIE line to have inducible overexpression of *NGN3* that enable vast upregulation of  
399 EEC numbers in the HIE. For the characterization of the tet*NGN3*-HIEs, we initially  
400 focused on enterochromaffin cells because they are the dominant intestinal EEC  
401 subtype and of great interest for EEC biology, and serve a key role in  
402 sensing/responding to microbial metabolites and intestinal pathophysiology [57-59]. We  
403 demonstrated that doxycycline-induced *NGN3* overexpression in human jejunal  
404 intestinal enteroids increased EECs, as measured by mRNA and protein expression of  
405 the endocrine marker *CHGA*. This response was doxycycline-dose dependent,  
406 demonstrating that the tet*NGN3*-HIEs allow for “tunable” customization of the number of  
407 EECs in different HIE formats (e.g., 3D, flat monolayers, and transwell monolayers).  
408 Further, in response to known stimuli, differentiated tet*NGN3*-HIEs release serotonin  
409 and several gut hormones characteristic of K cell, L cell, and enterochromaffin cell  
410 populations in a single culture system [12, 52, 53].

411           The tet*NGN3*-HIE model system described in this work overcomes some of the  
412 limitations associated with the existing models of EECs. In contrast to primary EECs  
413 isolated from tissue and cancer-derived cell lines, HIOs and HIEs are more robust and  
414 renewable model systems for studying EECs [29, 52, 60, 61]. However, like the  
415 intestine, few EECs spontaneously develop in both HIOs and HIEs, so the rarity of EEC  
416 cells remains a limitation of native organoid/enteroid cultures. Thus, increasing *NGN3*  
417 expression to drive EEC differentiation, as has been done in recent work with HIOs, is

418 an effective strategy to increase the abundance of EECs for study [29, 40, 62]. In HIOs,  
419 *NGN3* overexpression increased the number of ChgA-positive cells to 5% using  
420 adenovirus-based constitutive expression and to 23% using lentivirus-based  
421 doxycycline-inducible expression [29, 40, 62]. This is comparable to our results with the  
422 tet*NGN3*-HIEs wherein we obtained 40% ChgA-positive cells using a lentivirus-based  
423 inducible *NGN3* overexpression strategy. These results indicate that for both HIOs and  
424 HIEs, stably engineering the stem cell to have inducible expression of *NGN3* is an  
425 efficient approach to drive differentiation of higher numbers of EECs.

426 Together, the use of inducible *NGN3* expression in HIOs and HIEs establish  
427 complementary systems that will be widely useful to interrogate different aspects of  
428 EEC interactions in the GI tract. In the tet*NGN3*-HIEs model, the HIEs are derived from  
429 undifferentiated adult stem cells, and will therefore be particularly useful for studies of  
430 adult intestinal epithelial cell expression, function, and physiology. Indeed, isolation,  
431 establishment, and transduction of enteroids from individual patients to assess EEC  
432 function or response to drug treatments may be a future strategy for personalized  
433 medicine [63]. Whereas HIOs are composed of both epithelial and mesenchymal cells,  
434 HIEs consist of only epithelial cells so the tet*NGN3*-HIEs allow direct study of EEC  
435 interactions with other intestinal epithelial cells. Additionally, co-culture studies that  
436 combine the tet*NGN3*-HIEs with other cell types, such as immune cells, endothelial  
437 cells, and neurons, will be facilitated by the adaptability of HIEs to different culture  
438 formats (3D, 2D, and transwells), which is unique to HIE cultures. Finally, induction and  
439 differentiation of tet*NGN3*-HIEs yields EECs in 6-7 days, which may be a simpler and

440 faster system for generating increased numbers of EECs for higher-throughput studies  
441 of EEC responses to microbial, diet, or environmental stimuli.

442         The induced EECs from tet*NGN3*-HIEs exhibit strong functional responses to  
443 both norepinephrine and RV infection. Both norepinephrine and RV infection increased  
444 secretion of serotonin, MCP-1, and GIP, but RV infection also elicited secretion of PYY  
445 and ghrelin. Thus, this system displays distinct functional responses to different stimuli.  
446 HIEs have been established as a new, biologically relevant system to study RV-induced  
447 gut hormone secretion. RV infects enterochromaffin cells in HIEs and induces serotonin  
448 secretion both in mice and *in vitro* from GOT1 cells [12-14]. Here we show that RV  
449 infection of tet*NGN3*-HIEs induced serotonin secretion, but this response was  
450 significantly amplified by doxycycline-induction to increase EECs. Using transwell  
451 monolayers, we were able to show that serotonin is secreted both apically and  
452 basolaterally, though it is possible that some basolateral-to-apical diffusion of serotonin  
453 occurs, potentially through damaged tight junctions [12, 53]. RV also induced secretion  
454 of GIP, PYY, and ghrelin, which was only detected from doxycycline-induced tet*NGN3*-  
455 HIEs and indicates that biological responses from rare EECs may be missed in native  
456 enteroids. These finding highlights the potential tet*NGN3*-HIEs have for molecular  
457 discovery, because secretion of GIP, PYY, and ghrelin during RV infection has not  
458 previously been identified, so whether RV infects these EEC subtypes or secretion of  
459 these hormones occurs through other signaling pathways merits future investigation  
460 [64]. Finally, since insults to the epithelium elevate levels of catecholamines (e.g.,  
461 norepinephrine), the sensitivity of tet*NGN3*-HIEs to norepinephrine makes them a good

462 model for co-culture studies to measure EEC responses to inflammation or infection [48,  
463 87].

464         The tet*NGN3*-HIEs are a robust and versatile system for induction of EECs, but  
465 some limitations and unknowns about this new model remain. First, the induction of  
466 EECs in this system requires lentivirus-integration of a recombinant *NGN3* gene,  
467 making these an engineered intestinal organoid system. An alternative approach to  
468 induce endogenous EECs in mouse intestinal organoids was established through the  
469 combined inhibition of WNT, Notch, and EGFR (i.e., MAPK) signaling pathways [65].  
470 This method leads to increased EEC differentiation, with a concomitant decrease in  
471 Paneth and goblet cell numbers [65]. In contrast, the tet*NGN3*-HIEs maintained markers  
472 of both Paneth and goblet cells, suggesting that Ngn3 expression alone is insufficient to  
473 abolish these other lineage pathways. Second, using this HIE model, we observed  
474 increases in most EEC subtypes by RNA-seq and measured hormone secretion from  
475 enterochromaffin, L, K, and P/D1 cell subtypes. Although beyond the scope of this  
476 study, further studies are needed to determine whether the other subtypes are also  
477 functionally responsive to stimuli [66-71]. Finally, the tet*NGN3*-HIEs did not secrete  
478 serotonin in response to the short-chain fatty acid isovalerate, in contrast to recent  
479 studies using enteroids derived from ChgA-EGFP reporter mice (segment not specified)  
480 [52]. Inherent differences between the two systems, such as different receptor  
481 expression between human and mouse or between intestinal segments, may account  
482 for the different responses.

483         The tet*NGN3*-HIE system is a new and powerful tool for investigating the roles of  
484 EECs in microbial-environment-host communication, infection, inflammation,

485 metabolism. Doxycycline-induction of the tet*NGN3*-HIEs generates large numbers of  
486 EECs and amplifies EEC responses to biologically relevant stimuli, yet these cultures  
487 retain the salient characteristics of HIEs. Further, this is an adaptable system of in terms  
488 of both regulating the number of EECs and culture formats, which enables greater  
489 throughput and functional characterization of EEC responses to a multitude of stimuli.  
490 The ability of tet*NGN3*-HIEs to differentially respond to norepinephrine and RV infection  
491 suggests this new model system is well-suited to study the EEC modulatory effects of  
492 commensal microbes, microbial metabolites, pathogens and inflammatory mediators  
493 involved in epithelial health and disease.  
494

## 495 **Materials and Methods**

### 496 *Establishment of HIE cultures*

497 Human intestinal enteroid (HIE) cultures were generated from crypts isolated  
498 from the jejunal tissues of adult patients undergoing bariatric surgery as previously  
499 described [13]. These established cultures were obtained at Baylor College of Medicine  
500 through the Texas Medical Center Digestive Diseases Center Study Design and Clinical  
501 Research Core. Three-dimensional HIE cultures were prepared from the tissue samples  
502 and maintained in culture as described previously [13, 17]. For these studies, jejunum  
503 HIEs from patient J2 were used. Complete medium without growth factors (CMGF-) and  
504 complete medium with growth factors (CMGF+) were prepared as previously described  
505 [13, 17]. Briefly, CMGF- consisted of Advanced Dulbecco's modified Eagle medium  
506 (DMEM)/F-12 medium (Invitrogen) supplemented with 100 U/mL penicillin-streptomycin  
507 (Invitrogen), 10 mM HEPES buffer (Invitrogen), and 1X GlutaMAX (Invitrogen). CMGF+  
508 consisted of CMGF- medium with 50% (v/v) Wnt3A-conditioned medium, 20% (v/v) R-  
509 spondin conditioned medium, 10% (v/v) Noggin-conditioned medium, 1X B-27  
510 supplement (Invitrogen), 1X N-2 supplement (Invitrogen), 1 mM N-acetylcysteine  
511 (Sigma-Aldrich), 50 ng/mL mouse epidermal growth factor (EGF) (Invitrogen), 10 mM  
512 nicotinamide (Sigma-Aldrich, St. Louis, MO), 10 nM Leu-Gastrin I (Sigma-Aldrich), 500  
513 nM A-83-01 (Tocris Bioscience), and 10 nM SB202190 (Sigma-Aldrich).

514 Differentiation medium consisted of the same components as CMGF+ without  
515 Wnt3A conditioned medium, R-spondin conditioned medium, SB202190, and  
516 nicotinamide and only 5% (v/v) Noggin conditioned medium. High Wnt CMGF+ (hW-  
517 CMGF+), for creating and maintaining lentivirus-transduced HIEs, consisted of CMGF+



518 mixed with an additional 50% (v/v) Wnt3a conditioned medium. All HIEs were passaged  
519 in phenol red-free, growth factor-reduced Matrigel (Corning).

520

#### 521 *Creation of NGN3-expressing HIEs*

522 Tetracycline-inducible tetNGN3-expressing HIEs were created using lentivirus  
523 transduction. The tetNGN3 lentivirus transfer plasmid was in the pINDUCER backbone  
524 and a kind gift from Dr. Noah Shroyer and Dr. Jim Wells [62, 72]. The tetNGN3  
525 lentiviruses were packaged and harvested in-house with the packaging plasmid  
526 psPAX2, a gift from Dr. Didier Trono (Addgene plasmid #12260), and the envelope  
527 plasmid pCMV-VSV-G, a gift from Dr. Bob Weinberg (Addgene plasmid #8454), as  
528 described in more detail previously [73]. Virus packaging was assessed using Lenti-X  
529 GoStix (Clontech) but virus titers were not otherwise measured. Densely seeded  
530 jejunum HIEs were grown in hW-CMGF+ for one week to increase stem cell counts.  
531 HIEs were dissociated from Matrigel with ice-cold 1X phosphate buffered saline (PBS)  
532 and pipetted into 1.7 mL centrifugation tubes for centrifugation in a swinging bucket  
533 rotor at 200 x g for 5 min at 4°C. Supernatant was removed, HIEs were resuspended  
534 and washed twice with 1 mL ice-cold 1X PBS and centrifuged using the same  
535 conditions. Supernatants were removed and HIEs resuspended with lentivirus inoculum  
536 consisting of 8 µg/mL polybrene (EMD Millipore), 10 µM Y-27632 Rock inhibitor (Tocris  
537 Biosciences), 50 µL tetNGN3 lentivirus, and freshly made hW-CMGF+ for a total volume  
538 of 200 µL. HIEs were incubated with the inoculum in closed centrifugation tubes for 24  
539 hr at 37°C in a humidified 5% CO<sub>2</sub> incubator. After 24 hr, HIEs were centrifuged again  
540 and washed twice with ice-cold 1X PBS followed by suspension in Matrigel drops on a

541 24-well plate. Following Matrigel polymerization in the incubator for 10 min, 500  $\mu$ L of  
542 hW-CMGF+ medium was added to the well. Media was changed every other day for  
543 one week before passaging and selecting with 200  $\mu$ g/mL Geneticin (VWR). We refer to  
544 this transduced line as tetNGN3-HIEs, and they were grown in hW-CMGF+ with 200  
545  $\mu$ g/mL Geneticin.

546

#### 547 *Preparation and differentiation of HIE monolayers*

548 HIE monolayers were prepared from three-dimensional cultures and seeded into  
549 flat 96-well plates or transwells as described previously [21, 42]. In brief, 96-wells or  
550 transwell inserts (Costar, cat. no. 3413) were pre-treated with Matrigel diluted in 1XPBS  
551 (1:40) and incubated at 37°C. 3D HIEs were lifted from Matrigel and washed with an ice  
552 cold solution of 0.5 mM EDTA in 1X PBS and dissociated with 0.05% trypsin/0.5 mM  
553 EDTA for 4 min at 37°C. Trypsin was inactivated with CMGF- + 10% FBS and the cell  
554 solution was pipetted vigorously and filtered using a 40  $\mu$ m nylon cell strainer (Falcon,  
555 cat. no. 352340) to dissociate into single cells. Then cells were centrifuged for 5 min at  
556 400 x g, resuspended with CMGF+ and 10  $\mu$ M Y-27632 Rock inhibitor, and plated into  
557 prepared wells. After 48 hr in CMGF+ and 10  $\mu$ M Y-27632 Rock inhibitor, the medium  
558 was changed to differentiation media with the addition of 10  $\mu$ M Y-27632 Rock inhibitor  
559 and indicated concentrations of doxycycline (Fisher Scientific). Differentiation medium  
560 with Y-27632 and doxycycline was changed every day for 4-5 days to differentiate cells.

561

#### 562 *Immunofluorescence of HIE monolayers*

563 Two-dimensional HIE flat monolayers were fixed using the BD Cytotfix/Cytoperm  
564 kit (BD Biosciences, cat. no. 554714) according to manufacturer instructions. Primary  
565 antibodies were diluted in BD Perm/Wash buffer and (**Table 1**) were incubated at 4°C  
566 overnight. Primary antibodies were recognized by the appropriate secondary antibodies  
567 (**Table 1**) and incubated for 1 hr at room temperature. Nuclei were stained with DAPI  
568 (Thermo Fisher Scientific, cat. no. R37606) for 5 min at room temperature and washed  
569 with 1X PBS for imaging and storage.

570

#### 571 *Immunofluorescence of paraffin-embedded sections*

572 Three-dimensional (3D) HIEs embedded in Matrigel were gently removed and  
573 transferred to 1 mL syringes. The cells were then fixed in 4% (v/v) paraformaldehyde  
574 solution for 1 hr at room temperature. After fixation, cells were deposited into a cassette  
575 for paraffin embedding. For transwell cross-sections HIE membranes were cut from  
576 transwells, fixed in 4% (v/v) paraformaldehyde solution for 1 hr at room temperature and  
577 placed into cassettes for paraffin embedding. Paraffin-embedded sections of 7 µm in  
578 thickness were subjected to a series of dehydration steps. Epitope retrieval was  
579 performed by incubating slides with Vector Labs Antigen Unmasking Solution Citrate  
580 Buffer pH 6 (Vector labs, cat no. H-3300) for 20 min at 100°C in a steamer. Slides were  
581 then blocked for 1 hr at room temperature in 10% goat and/or donkey serum. Primary  
582 antibodies (**Table 1**) were incubated at 4°C overnight. Primary antibodies were  
583 recognized by the appropriate secondary antibodies (**Table 1**) and incubated for 1 hr at  
584 room temperature. Nuclei were stained with DAPI (Thermo Fisher Scientific, cat. no.

585 R37606) for 5 min at room temperature. All slides were cover-slipped with mounting  
586 media (Life Technologies) and imaged.

587

### 588 *Transmission Electron Microscopy*

589 Three-dimensional HIEs embedded in Matrigel were primary fixed in a solution of  
590 2% paraformaldehyde + 2.5% glutaraldehyde + 2 mM calcium chloride in 0.1 M  
591 cacodylate buffer (pH = 7.4) for 5-7 days at 4°C. They were post-fixed in 1% osmium  
592 tetroxide in 0.1 M cacodylate buffer for 1 hr and en bloc stained with saturated aqueous  
593 uranyl acetate. After a routine dehydration sequence, tissue pieces were gradually  
594 infiltrated in a gradient series of Spurr's Low Viscosity resin and ethanol, then  
595 embedded in fresh Spurr's resin and polymerized at 60° C for 3 days. 55-60 nm thin  
596 sections were cut on a Leica UC7 ultra-microtome using a Diatome Ultra 45 diamond  
597 knife. Sections were viewed on a Hitachi H7500 transmission electron microscope set to  
598 80kV. Images were collected using an AMT XR-16 digital camera and AMT Image  
599 Capture, v602.600.51 software.

600

### 601 *Microscopy and image analysis*

602 tetNGN3-HIEs were imaged with widefield epifluorescence on a Nikon TiE  
603 inverted microscope and an upright Nikon Eclipse 90i microscope using a SPECTRA X  
604 LED light source (Lumencor) as well as a Nikon A1plus point scanning confocal  
605 microscope for fluorescence imaging. The following objectives were used: 10X Plan  
606 Fluor (NA 0.3) phase contrast objective, 20X Plan Apo (NA 0.75) differential  
607 interference contrast (DIC) objective, a 40X Apo DIC water objective, and a Plan Apo

608 VC 60X Oil DIC objective. Fluorescence images were recorded using either an ORCA-  
609 Flash 4.0 sCMOS camera (Hamamatsu) or a CoolSNAP HQ2 camera (Photometrics),  
610 and color images for H&E sections were recorded using a DS-Fi1-U2 camera (Nikon).  
611 Nikon Elements Advanced Research v4.5 software was used for data acquisition and  
612 image analysis.

613 To quantify ChgA-positive cells in 3D and monolayer tet*NGN3*-HIEs, images  
614 were analyzed using Nikon Elements software. Individual images were processed with a  
615 4  $\mu\text{m}$  size threshold by channel to reduce noise from nonspecific staining. Images were  
616 morphologically separated using a 3x3 matrix, and objects touching the borders were  
617 removed. The percent of positive cells was the number of Alexa Fluor 488-positive  
618 objects divided by the number of DAPI-stained detected nuclei. At least 5 images per  
619 condition were analyzed with an average of 140 (3D cultures) or 1400 (flat monolayers)  
620 nuclei per image.

621

#### 622 *RNA extraction, reverse transcription, and real-time PCR*

623 tet*NGN3*-HIEs were rinsed once with ice cold 1XPBS and transferred to a  
624 centrifugation tube (technical duplicates were combined into a single tube). Cells were  
625 lysed by the addition of 1 mL of TRIZOL Reagent (Invitrogen) and mixed thoroughly  
626 using a vortex mixer for 30 seconds. Chloroform (200  $\mu\text{L}$ ) was added, the samples were  
627 mixed again, and then incubated for 5 min at room temperature. The phases were  
628 separated by centrifugation at 14,000 x *g* for 10 min, and the aqueous phase was  
629 moved to a new tube (~400  $\mu\text{L}$ ). Total RNA was then isolated using the RNeasy  
630 Isolation Kit (Qiagen) according to the manufacturer's instructions. RNA was eluted in

631 20  $\mu$ L sterile nuclease free water (Fischer Scientific). RNA concentration and purity  
632 were determined by absorbance at 260 nm and 280 nm using a spectrophotometer  
633 (DS-11, DeNovix). RNA (200 ng) was treated with DNase (Ambion Turbo DNA-free) to  
634 remove any contaminating genomic DNA per manufacturer's directions, and then cDNA  
635 was synthesized from purified total RNA using SuperScript III reverse transcriptase  
636 (Invitrogen) according to the manufacturer's instructions. Reaction components included  
637 random hexamers (Integrated DNA Technologies), 10 mM dNTPs (New England  
638 Biosciences), and approximately 2 ng of RNA. No reverse transcriptase controls were  
639 included by omitting SuperScript III.

640 Real time PCR reactions were performed in triplicate with the following reaction  
641 components: 1  $\mu$ L cDNA, 0.25  $\mu$ L of 20 mM forward and reverse primer (**Table 2**), 10  $\mu$ L  
642 Power SYBR Green PCR MasterMix (Applied Biosystems), and 8.5  $\mu$ L nuclease free  
643 water (Fisher Scientific). Real-time PCR was performed using QuantStudio real time  
644 thermocycler (Applied Biosciences) under the following conditions: 95°C 10 min, 40  
645 cycles of 95°C for 15 seconds, followed by 60°C for 1 min, when data was recorded. A  
646 melting curve between 60°C and 95°C was performed. No template controls were  
647 included by substituting water for the cDNA in the reaction.  $C_T$  values of technical  
648 replicates were averaged for each independent biological experiment and normalized to  
649 the expression of the 18S ribosomal subunit. Data graphed are representative of 3  
650 experiments (n=3 biological replicates, with 3 technical replicates in each experiment).

651

652 *Preparation of HIE transwells for RNA-sequencing and transcriptional analysis*

653 To assess the transcriptional profile changes of *tetNGN3-HIEs* during  
654 doxycycline induction. HIE monolayers were prepared on transwells and differentiated  
655 as described above. The total RNA was extracted from transwells in the presence or  
656 absence of 1  $\mu\text{g/ml}$  doxycycline using the same protocol as for RT and qPCR described  
657 above. rRNA integrity was checked on an Agilent 2100 bioanalyzer from six  
658 independent biological replicates per condition. Paired-end Illumina sequencing was  
659 performed on mRNA enriched samples by Novogene (USA) following the standard  
660 work-flow procedure. Raw sequence reads were mapped to human genome hg19 using  
661 STAR software to generate the number of fragments per kilobase per million mapped  
662 reads (FPKM) for each gene. Ratios of transcript abundance per group were based on  
663 the  $\log_2$  FPKM value in 1  $\mu\text{g/ml}$  doxycycline condition relative to the 0  $\mu\text{g/mL}$   
664 doxycycline condition were used to determine the fold change in gene expression.  
665 Samples were filtered for those containing >10% N value, presence of adaptor  
666 sequences, and quality. Greater than 97% of reads in each sample were clean reads  
667 post-filtering with error rates  $\leq 0.03\%$ . Pearson correlation coefficients between samples  
668 were between 0.92 and 0.97  $R^2$  values. In total, 10,741 genes were differentially  
669 expressed between the groups (5,870 up-regulated, 4,871 down-regulated) as indicated  
670 by DESeq2 analysis using a padj value  $<0.05$ , and a  $\log_2$  fold change  $>1$ , q-value  
671  $<0.005$ .

672

### 673 *Isovalerate and norepinephrine stimulation*

674 After four days in differentiation medium and induced with 0, 0.1, or 1  $\mu\text{g/mL}$   
675 doxycycline, confluent HIE monolayers were washed with 1XPBS. Isovalerate (Sigma-

676 Aldrich) and noradrenaline bitartrate (Tocris Bioscience) solutions were prepared in 1X  
677 PBS and added to the HIE monolayers. Monolayers were incubated for 2 hr at 37°C and  
678 5% CO<sub>2</sub>. Following incubation, supernatants were harvested and kept at -20°C for  
679 downstream analysis. PrestoBlue Cell Viability Reagent (ThermoFisher Scientific), a  
680 resazurin-based assay, was utilized according to manufacturer's recommended  
681 protocols. Fluorescence intensity of reduced resazurin (560-610 nm, Infinite F200Pro,  
682 Tecan) measures metabolic activity of the cells and was used as an indication of cell  
683 viability.

684

#### 685 *Rotavirus infection of HIE monolayers*

686 African green monkey kidney (MA104) cells were cultured in DMEM  
687 supplemented with 10% (v/v) fetal bovine serum (Corning). Ito RV (G3[P8]) was  
688 propagated in MA104 cells in serum-free DMEM in the presence of 1 µg/mL  
689 Worthington's Trypsin (Worthington Biochemical). After harvest, stocks were subjected  
690 to three freeze/thaw cycles. Plaque assays with MA104 cells were used to determine  
691 the titers of the viral preparations. The tet*NGN3*-HIE flat or transwell monolayers were  
692 induced with 0, 0.1, or 1 µg/mL doxycycline in differentiation media for 4-5 days. For  
693 infection, the confluent HIE monolayers were washed once with CMGF-. Mock MA104  
694 cell lysates and Ito RV were treated with 10 µg/mL Worthington's trypsin for 30 min at  
695 37°C. Then the tet*NGN3*-HIE monolayers were treated with an inoculum of CMGF- with  
696 MA104 cell lysate or Ito RV. Cells were infected basolaterally following observations  
697 that this method results in more efficient infections (Blutt, Crawford, and Estes,  
698 unpublished data). Transwell and flat monolayers were incubated for 1 hr or 2 hr,



699 respectively, at 37°C with 5% CO<sub>2</sub>. Following incubation, the supernatants were  
700 removed and replaced with differentiation media and returned to the incubator. For the 1  
701 hpi timepoint, supernatants were collected 5 min after washing inoculum. Supernatants  
702 were harvested and kept at -20°C for downstream analyses.

703

#### 704 *Measurement of serotonin release*

705 Serotonin secretion by HIEs following stimulation with norepinephrine,  
706 isovalerate, or RV infection was quantified by ELISA (Eagle Biosciences) according to  
707 the manufacturer's instructions. A standard curve of known serotonin concentrations  
708 was plotted against optical density at 450 nm with a limit of detection of 2.6 ng/mL  
709 (Infinite F200Pro, Tecan).

710

#### 711 *Measurement of metabolic hormones*

712 Hormone secretion was quantified by Luminex assay (Human Metabolic  
713 Hormone Magnetic Bead Panel, HMHEMAG-34K, EMD Millipore) according to  
714 manufacturer's standard protocol. Supernatants following stimulation with  
715 norepinephrine or RV infection were assayed for the amount of secreted amylin (active),  
716 C-Peptide, ghrelin (active), GIP (total), GLP-1 (total), glucagon, IL-6, leptin, MCP-1, PP,  
717 PYY (total), and TNF- $\alpha$ . Limits of detection of the assay are: amylin 11.81 pg/ml, C-  
718 Peptide 13.28 pg/ml, ghrelin 9.40 pg/ml, GIP 0.33 pg/ml, GLP-1 1.11 pg/ml, glucagon  
719 12.73 pg/ml, IL-6 3.75 pg/ml, leptin 54.16 pg/ml, MCP-1 8.57 pg/ml, PP 0.68 pg/ml, PYY  
720 11.18 pg/ml, and TNF- $\alpha$  <0.14 pg/ml.

721

722 *Statistical analysis*

723           Biostatistical analyses were performed using GraphPad Prism (version 7)  
724 software (GraphPad Inc., La Jolla, CA). Comparisons were made with either One-way  
725 or Two-way Analysis of Variance (ANOVA) and Tukey's post hoc multiple comparisons  
726 test when appropriate. Differences between the groups were considered significant at  $p$   
727  $< 0.05$  (\*), and the data are presented as mean  $\pm$  standard deviation. All authors had  
728 access to the study data, reviewed, and approved the final manuscript.

729

730 **Acknowledgments**

731 We would like to thank Dr. Noah Shroyer for providing the tet*NGN3* plasmid. The BCM  
732 Medical Scientist Training Program and the Integrative Molecular and Biomedical  
733 Sciences Graduate Program provided additional trainee support (A.C.G). We would like  
734 to thank Xi-Lei (Shelly) Zeng and Xiaomin Yu of the Digestive Diseases Center Enteroid  
735 Core for their help with maintaining the enteroid culturing and enteroid media. We thank  
736 Debra Townley and Michael A. Mancini, Ph.D. of the Integrated Microscopy Core for  
737 their help with transmission electron microscopy of the enteroids.

738

739

740 **References**

- 741 [1] Ferraris RP, Lee PP, Diamond JM. Origin of regional and species differences in  
742 intestinal glucose uptake. *Am J Physiol* 1989;257(5 Pt 1):G689-97.
- 743 [2] Bergman EN. Energy contributions of volatile fatty acids from the gastrointestinal  
744 tract in various species. *Physiol Rev* 1990;70(2):567-90.
- 745 [3] Worthington JJ, Reimann F, Gribble FM. Enteroendocrine cells-sensory sentinels  
746 of the intestinal environment and orchestrators of mucosal immunity. *Mucosal*  
747 *Immunol* 2018;11(1):3-20.
- 748 [4] Schonhoff SE, Giel-Moloney M, Leiter AB. Minireview: Development and  
749 differentiation of gut endocrine cells. *Endocrinology* 2004;145(6):2639-44.
- 750 [5] Ahlman H, Nilsson. The gut as the largest endocrine organ in the body. *Ann*  
751 *Oncol* 2001;12 Suppl 2:S63-8.
- 752 [6] Sternini C, Anselmi L, Rozengurt E. Enteroendocrine cells: a site of 'taste' in  
753 gastrointestinal chemosensing. *Curr Opin Endocrinol Diabetes Obes*  
754 2008;15(1):73-8.
- 755 [7] Rehfeld JF. The new biology of gastrointestinal hormones. *Physiol Rev*  
756 1998;78(4):1087-108.
- 757 [8] Sjolund K, Sanden G, Hakanson R, Sundler F. Endocrine cells in human  
758 intestine: an immunocytochemical study. *Gastroenterology* 1983;85(5):1120-30.
- 759 [9] Solcia E, Capella C, Buffa R, Usellini L, Fiocca R, Frigerio B, Tenti P, Sessa F.  
760 The diffuse endocrine-paracrine system of the gut in health and disease:  
761 ultrastructural features. *Scand J Gastroenterol Suppl* 1981;70:25-36.
- 762 [10] Roth KA, Gordon JI. Spatial differentiation of the intestinal epithelium: analysis of  
763 enteroendocrine cells containing immunoreactive serotonin, secretin, and  
764 substance P in normal and transgenic mice. *Proc Natl Acad Sci U S A*  
765 1990;87(16):6408-12.
- 766 [11] Andrews PL, Davis CJ, Bingham S, Davidson HI, Hawthorn J, Maskell L. The  
767 abdominal visceral innervation and the emetic reflex: pathways, pharmacology,  
768 and plasticity. *Can J Physiol Pharmacol* 1990;68(2):325-45.
- 769 [12] Hagbom M, Istrate C, Engblom D, Karlsson T, Rodriguez-Diaz J, Buesa J, Taylor  
770 JA, Loitto VM, Magnusson KE, Ahlman H, Lundgren O, Svensson L. Rotavirus  
771 stimulates release of serotonin (5-HT) from human enterochromaffin cells and  
772 activates brain structures involved in nausea and vomiting. *PLoS Pathog*  
773 2011;7(7):e1002115.
- 774 [13] Saxena K, Blutt SE, Ettayebi K, Zeng XL, Broughman JR, Crawford SE,  
775 Karandikar UC, Sastri NP, Conner ME, Opekun AR, Graham DY, Qureshi W,  
776 Sherman V, Foulke-Abel J, In J, Kovbasnjuk O, Zachos NC, Donowitz M, Estes  
777 MK. Human Intestinal Enteroids: a New Model To Study Human Rotavirus  
778 Infection, Host Restriction, and Pathophysiology. *J Virol* 2016;90(1):43-56.
- 779 [14] Zachos NC, Kovbasnjuk O, Foulke-Abel J, In J, Blutt SE, de Jonge HR, Estes  
780 MK, Donowitz M. Human Enteroids/Colonoids and Intestinal Organoids  
781 Functionally Recapitulate Normal Intestinal Physiology and Pathophysiology. *J*  
782 *Biol Chem* 2016;291(8):3759-66.
- 783 [15] Clevers H. Modeling Development and Disease with Organoids. *Cell*  
784 2016;165(7):1586-97.

- 785 [16] Bartfeld S. Modeling infectious diseases and host-microbe interactions in  
786 gastrointestinal organoids. *Dev Biol* 2016;420(2):262-70.
- 787 [17] Sato T, Stange DE, Ferrante M, Vries RG, Van Es JH, Van den Brink S, Van  
788 Houdt WJ, Pronk A, Van Gorp J, Siersema PD, Clevers H. Long-term expansion  
789 of epithelial organoids from human colon, adenoma, adenocarcinoma, and  
790 Barrett's epithelium. *Gastroenterology* 2011;141(5):1762-72.
- 791 [18] Sato T, Vries RG, Snippert HJ, van de Wetering M, Barker N, Stange DE, van Es  
792 JH, Abo A, Kujala P, Peters PJ, Clevers H. Single Lgr5 stem cells build crypt-  
793 villus structures in vitro without a mesenchymal niche. *Nature*  
794 2009;459(7244):262-5.
- 795 [19] Foulke-Abel J, In J, Kovbasnjuk O, Zachos NC, Ettayebi K, Blutt SE, Hyser JM,  
796 Zeng XL, Crawford SE, Broughman JR, Estes MK, Donowitz M. Human  
797 enteroids as an ex-vivo model of host-pathogen interactions in the  
798 gastrointestinal tract. *Exp Biol Med (Maywood)* 2014;239(9):1124-34.
- 799 [20] Foulke-Abel J, In J, Yin J, Zachos NC, Kovbasnjuk O, Estes MK, de Jonge H,  
800 Donowitz M. Human Enteroids as a Model of Upper Small Intestinal Ion  
801 Transport Physiology and Pathophysiology. *Gastroenterology* 2016;150(3):638-  
802 49 e8.
- 803 [21] Ettayebi K, Crawford SE, Murakami K, Broughman JR, Karandikar U, Tenge VR,  
804 Neill FH, Blutt SE, Zeng XL, Qu L, Kou B, Opekun AR, Burrin D, Graham DY,  
805 Ramani S, Atmar RL, Estes MK. Replication of human noroviruses in stem cell-  
806 derived human enteroids. *Science* 2016;353(6306):1387-93.
- 807 [22] Apelqvist A, Li H, Sommer L, Beatus P, Anderson DJ, Honjo T, Hrabe de Angelis  
808 M, Lendahl U, Edlund H. Notch signalling controls pancreatic cell differentiation.  
809 *Nature* 1999;400(6747):877-81.
- 810 [23] Gradwohl G, Dierich A, LeMeur M, Guillemot F. neurogenin3 is required for the  
811 development of the four endocrine cell lineages of the pancreas. *Proc Natl Acad  
812 Sci U S A* 2000;97(4):1607-11.
- 813 [24] Jenny M, Uhl C, Roche C, Duluc I, Guillermin V, Guillemot F, Jensen J, Kedinger  
814 M, Gradwohl G. Neurogenin3 is differentially required for endocrine cell fate  
815 specification in the intestinal and gastric epithelium. *EMBO J* 2002;21(23):6338-  
816 47.
- 817 [25] Jensen J, Heller RS, Funder-Nielsen T, Pedersen EE, Lindsell C, Weinmaster G,  
818 Madsen OD, Serup P. Independent development of pancreatic alpha- and beta-  
819 cells from neurogenin3-expressing precursors: a role for the notch pathway in  
820 repression of premature differentiation. *Diabetes* 2000;49(2):163-76.
- 821 [26] Schwitzgebel VM, Scheel DW, Connors JR, Kalamaras J, Lee JE, Anderson DJ,  
822 Sussel L, Johnson JD, German MS. Expression of neurogenin3 reveals an islet  
823 cell precursor population in the pancreas. *Development* 2000;127(16):3533-42.
- 824 [27] Suissa Y, Magenheimer J, Stolovich-Rain M, Hija A, Collombat P, Mansouri A,  
825 Sussel L, Sosa-Pineda B, McCracken K, Wells JM, Heller RS, Dor Y, Glaser B.  
826 Gastrin: a distinct fate of neurogenin3 positive progenitor cells in the embryonic  
827 pancreas. *PLoS One* 2013;8(8):e70397.
- 828 [28] McGrath PS, Watson CL, Ingram C, Helmrath MA, Wells JM. The Basic Helix-  
829 Loop-Helix Transcription Factor NEUROG3 Is Required for Development of the  
830 Human Endocrine Pancreas. *Diabetes* 2015;64(7):2497-505.

- 831 [29] Spence JR, Mayhew CN, Rankin SA, Kuhar MF, Vallance JE, Tolle K, Hoskins  
832 EE, Kalinichenko VV, Wells SI, Zorn AM, Shroyer NF, Wells JM. Directed  
833 differentiation of human pluripotent stem cells into intestinal tissue in vitro. *Nature*  
834 2011;470(7332):105-9.
- 835 [30] Sinagoga KL, Wells JM. Generating human intestinal tissues from pluripotent  
836 stem cells to study development and disease. *EMBO J* 2015;34(9):1149-63.
- 837 [31] Pinney SE, Oliver-Krasinski J, Ernst L, Hughes N, Patel P, Stoffers DA, Russo P,  
838 De Leon DD. Neonatal diabetes and congenital malabsorptive diarrhea  
839 attributable to a novel mutation in the human neurogenin-3 gene coding  
840 sequence. *J Clin Endocrinol Metab* 2011;96(7):1960-5.
- 841 [32] Rubio-Cabezas O, Jensen JN, Hodgson MI, Codner E, Ellard S, Serup P,  
842 Hattersley AT. Permanent Neonatal Diabetes and Enteric Anendocrinosis  
843 Associated With Biallelic Mutations in *NEUROG3*. *Diabetes* 2011;60(4):1349-53.
- 844 [33] German-Diaz M, Rodriguez-Gil Y, Cruz-Rojo J, Charbit-Henrion F, Cerf-  
845 Bensussan N, Manzanares-Lopez Manzanares J, Moreno-Villares JM. A New  
846 Case of Congenital Malabsorptive Diarrhea and Diabetes Secondary to Mutant  
847 Neurogenin-3. *Pediatrics* 2017;140(2):e1-6.
- 848 [34] Jensen JN, Rosenberg LC, Hecksher-Sorensen J, Serup P. Mutant neurogenin-3  
849 in congenital malabsorptive diarrhea. *N Engl J Med* 2007;356(17):1781-2.
- 850 [35] Unlusoy Aksu A, Egritas Gurkan O, Sari S, Demirtas Z, Turkyilmaz C, Poyraz A,  
851 Dalgic B. Mutant neurogenin-3 in a Turkish boy with congenital malabsorptive  
852 diarrhea. *Pediatr Int* 2016;58(5):379-82.
- 853 [36] Wang J, Cortina G, Wu SV, Tran R, Cho JH, Tsai MJ, Bailey TJ, Jamrich M,  
854 Ament ME, Treem WR, Hill ID, Vargas JH, Gershman G, Farmer DG, Reyen L,  
855 Martin MG. Mutant neurogenin-3 in congenital malabsorptive diarrhea. *N Engl J*  
856 *Med* 2006;355(3):270-80.
- 857 [37] Ueo T, Imayoshi I, Kobayashi T, Ohtsuka T, Seno H, Nakase H, Chiba T,  
858 Kageyama R. The role of Hes genes in intestinal development, homeostasis and  
859 tumor formation. *Development* 2012;139(6):1071-82.
- 860 [38] Chen YJ, Finkbeiner SR, Weinblatt D, Emmett MJ, Tameire F, Yousefi M, Yang  
861 C, Maehr R, Zhou Q, Shemer R, Dor Y, Li C, Spence JR, Stanger BZ. De novo  
862 formation of insulin-producing "neo-beta cell islets" from intestinal crypts. *Cell*  
863 *Rep* 2014;6(6):1046-58.
- 864 [39] Ootani A, Li X, Sangiorgi E, Ho QT, Ueno H, Toda S, Sugihara H, Fujimoto K,  
865 Weissman IL, Capecchi MR, Kuo CJ. Sustained in vitro intestinal epithelial  
866 culture within a Wnt-dependent stem cell niche. *Nat Med* 2009;15(6):701-6.
- 867 [40] Sinagoga KL, McCauley HA, Munera JO, Reynolds NA, Enriquez JR, Watson C,  
868 Yang HC, Helmrath MA, Wells JM. Deriving functional human enteroendocrine  
869 cells from pluripotent stem cells. *Development* 2018;145(19).
- 870 [41] Wade PR, Westfall JA. Ultrastructure of enterochromaffin cells and associated  
871 neural and vascular elements in the mouse duodenum. *Cell Tissue Res*  
872 1985;241(3):557-63.
- 873 [42] VanDussen KL, Marinshaw JM, Shaikh N, Miyoshi H, Moon C, Tarr PI, Ciorba  
874 MA, Stappenbeck TS. Development of an enhanced human gastrointestinal  
875 epithelial culture system to facilitate patient-based assays. *Gut* 2015;64(6):911-  
876 20.

- 877 [43] Leushacke M, Barker N, Pin C. Quantifying Lgr5-positive stem cell behaviour in  
878 the pyloric epithelium. *Sci Rep* 2016;6:21923.
- 879 [44] Bertrand PP, Barajas-Espinosa A, Neshat S, Bertrand RL, Lomax AE. Analysis of  
880 real-time serotonin (5-HT) availability during experimental colitis in mouse. *Am J*  
881 *Physiol Gastrointest Liver Physiol* 2010;298(3):G446-55.
- 882 [45] Linden DR, Foley KF, McQuoid C, Simpson J, Sharkey KA, Mawe GM. Serotonin  
883 transporter function and expression are reduced in mice with TNBS-induced  
884 colitis. *Neurogastroenterol Motil* 2005;17(4):565-74.
- 885 [46] Wheatcroft J, Wakelin D, Smith A, Mahoney CR, Mawe G, Spiller R.  
886 Enterochromaffin cell hyperplasia and decreased serotonin transporter in a  
887 mouse model of postinfectious bowel dysfunction. *Neurogastroenterol Motil*  
888 2005;17(6):863-70.
- 889 [47] Bischoff SC, Mailer R, Pabst O, Weier G, Sedlik W, Li Z, Chen JJ, Murphy DL,  
890 Gershon MD. Role of serotonin in intestinal inflammation: knockout of serotonin  
891 reuptake transporter exacerbates 2,4,6-trinitrobenzene sulfonic acid colitis in  
892 mice. *Am J Physiol Gastrointest Liver Physiol* 2009;296(3):G685-95.
- 893 [48] Coates MD, Mahoney CR, Linden DR, Sampson JE, Chen J, Blaszyk H, Crowell  
894 MD, Sharkey KA, Gershon MD, Mawe GM, Moses PL. Molecular defects in  
895 mucosal serotonin content and decreased serotonin reuptake transporter in  
896 ulcerative colitis and irritable bowel syndrome. *Gastroenterology*  
897 2004;126(7):1657-64.
- 898 [49] Khan WI. The Role of 5-HT Dysregulation in Inflammatory Bowel Disease.  
899 *Gastroenterol Hepatol (N Y)* 2013;9(4):259-61.
- 900 [50] Wang Y, Gong H, Lopez R, Lian L, Kiran RP, Soffer EE, Shen B. Correlation  
901 between serum serotonin and endoscopy inflammation scores in patients with  
902 ileal pouches. *J Crohns Colitis* 2013;7(4):e133-42.
- 903 [51] Thomson AB, Drozdowski L, Iordache C, Thomson BK, Vermeire S, Clandinin  
904 MT, Wild G. Small bowel review: Normal physiology, part 2. *Dig Dis Sci*  
905 2003;48(8):1565-81.
- 906 [52] Bellono NW, Bayrer JR, Leitch DB, Castro J, Zhang C, O'Donnell TA, Brierley  
907 SM, Ingraham HA, Julius D. Enterochromaffin Cells Are Gut Chemosensors that  
908 Couple to Sensory Neural Pathways. *Cell* 2017;170(1):185-98 e16.
- 909 [53] Bialowas S, Hagbom M, Nordgren J, Karlsson T, Sharma S, Magnusson KE,  
910 Svensson L. Rotavirus and Serotonin Cross-Talk in Diarrhoea. *PLoS One*  
911 2016;11(7):e0159660.
- 912 [54] Gabanyi I, Muller PA, Feighery L, Oliveira TY, Costa-Pinto FA, Mucida D. Neuro-  
913 immune Interactions Drive Tissue Programming in Intestinal Macrophages. *Cell*  
914 2016;164(3):378-91.
- 915 [55] Neis EP, Dejong CH, Rensen SS. The role of microbial amino acid metabolism in  
916 host metabolism. *Nutrients* 2015;7(4):2930-46.
- 917 [56] Cox HM. Neuropeptide Y receptors; antisecretory control of intestinal epithelial  
918 function. *Auton Neurosci* 2007;133(1):76-85.
- 919 [57] O'Mahony SM, Clarke G, Borre YE, Dinan TG, Cryan JF. Serotonin, tryptophan  
920 metabolism and the brain-gut-microbiome axis. *Behav Brain Res* 2015;277:32-  
921 48.

- 922 [58] Yano JM, Yu K, Donaldson GP, Shastri GG, Ann P, Ma L, Nagler CR, Ismagilov  
923 RF, Mazmanian SK, Hsiao EY. Indigenous bacteria from the gut microbiota  
924 regulate host serotonin biosynthesis. *Cell* 2015;161(2):264-76.
- 925 [59] Evrensel A, Ceylan ME. The Gut-Brain Axis: The Missing Link in Depression.  
926 *Clin Psychopharmacol Neurosci* 2015;13(3):239-44.
- 927 [60] Tsuruta T, Saito S, Osaki Y, Hamada A, Aoki-Yoshida A, Sonoyama K.  
928 Organoids as an ex vivo model for studying the serotonin system in the murine  
929 small intestine and colon epithelium. *Biochem Biophys Res Commun*  
930 2016;474(1):161-7.
- 931 [61] Kishida K, Pearce SC, Yu S, Gao N, Ferraris RP. Nutrient sensing by absorptive  
932 and secretory progenies of small intestinal stem cells. *Am J Physiol Gastrointest*  
933 *Liver Physiol* 2017;312(6):G592-G605.
- 934 [62] McCracken KW, Cata EM, Crawford CM, Sinagoga KL, Schumacher M, Rockich  
935 BE, Tsai YH, Mayhew CN, Spence JR, Zavros Y, Wells JM. Modelling human  
936 development and disease in pluripotent stem-cell-derived gastric organoids.  
937 *Nature* 2014;516(7531):400-4.
- 938 [63] Dekkers JF, Berkers G, Kruisselbrink E, Vonk A, de Jonge HR, Janssens HM,  
939 Bronsveld I, van de Graaf EA, Nieuwenhuis EE, Houwen RH, Vleggaar FP,  
940 Escher JC, de Rijke YB, Majoor CJ, Heijerman HG, de Winter-de Groot KM,  
941 Clevers H, van der Ent CK, Beekman JM. Characterizing responses to CFTR-  
942 modulating drugs using rectal organoids derived from subjects with cystic  
943 fibrosis. *Science translational medicine* 2016;8(344):344ra84.
- 944 [64] Rollo EE, Kumar KP, Reich NC, Cohen J, Angel J, Greenberg HB, Sheth R,  
945 Anderson J, Oh B, Hempson SJ, Mackow ER, Shaw RD. The epithelial cell  
946 response to rotavirus infection. *J Immunol* 1999;163(8):4442-52.
- 947 [65] Basak O, Beumer J, Wiebrands K, Seno H, van Oudenaarden A, Clevers H.  
948 Induced Quiescence of Lgr5+ Stem Cells in Intestinal Organoids Enables  
949 Differentiation of Hormone-Producing Enteroendocrine Cells. *Cell Stem Cell*  
950 2017;20(2):177-90 e4.
- 951 [66] Grun D, Lyubimova A, Kester L, Wiebrands K, Basak O, Sasaki N, Clevers H,  
952 van Oudenaarden A. Single-cell messenger RNA sequencing reveals rare  
953 intestinal cell types. *Nature* 2015;525(7568):251-5.
- 954 [67] Petersen N, Reimann F, Bartfeld S, Farin HF, Ringnalda FC, Vries RG, van den  
955 Brink S, Clevers H, Gribble FM, de Koning EJ. Generation of L cells in mouse  
956 and human small intestine organoids. *Diabetes* 2014;63(2):410-20.
- 957 [68] Zietek T, Rath E, Haller D, Daniel H. Intestinal organoids for assessing nutrient  
958 transport, sensing and incretin secretion. *Sci Rep* 2015;5:16831.
- 959 [69] Petersen N, Reimann F, van Es JH, van den Berg BM, Kroone C, Pais R, Jansen  
960 E, Clevers H, Gribble FM, de Koning EJ. Targeting development of incretin-  
961 producing cells increases insulin secretion. *J Clin Invest* 2015;125(1):379-85.
- 962 [70] Bohorquez DV, Samsa LA, Roholt A, Medicetty S, Chandra R, Liddle RA. An  
963 enteroendocrine cell-enteric glia connection revealed by 3D electron microscopy.  
964 *PLoS One* 2014;9(2):e89881.
- 965 [71] Pattison AM, Blomain ES, Merlino DJ, Wang F, Crissey MA, Kraft CL, Rappaport  
966 JA, Snook AE, Lynch JP, Waldman SA. Intestinal Enteroids Model Guanylate

- 967 Cyclase C-Dependent Secretion Induced by Heat-Stable Enterotoxins. *Infect*  
968 *Immun* 2016;84(10):3083-91.
- 969 [72] McCracken KW, Aihara E, Martin B, Crawford CM, Broda T, Treguier J, Zhang X,  
970 Shannon JM, Montrose MH, Wells JM. Wnt/beta-catenin promotes gastric fundus  
971 specification in mice and humans. *Nature* 2017;541(7636):182-7.
- 972 [73] Perry JL, Ramachandran NK, Utama B, Hyser JM. Use of genetically-encoded  
973 calcium indicators for live cell calcium imaging and localization in virus-infected  
974 cells. *Methods* 2015;90:28-38.
- 975 [74] Criglar JM, Hu L, Crawford SE, Hyser JM, Broughman JR, Prasad BV, Estes MK.  
976 A novel form of rotavirus NSP2 and phosphorylation-dependent NSP2-NSP5  
977 interactions are associated with viroplasm assembly. *J Virol* 2014;88(2):786-98.
- 978 [75] Castro I, Aguilera S, Brockhausen I, Alliende C, Quest AF, Molina C, Urzua U,  
979 Mandel U, Bahamondes V, Barrera MJ, Sanchez M, Gonzalez S, Hermoso M,  
980 Leyton C, Gonzalez MJ. Decreased salivary sulphotransferase activity correlated  
981 with inflammation and autoimmunity parameters in Sjogren's syndrome patients.  
982 *Rheumatology (Oxford)* 2012;51(3):482-90.
- 983 [76] Andreu P, Peignon G, Slomianny C, Taketo MM, Colnot S, Robine S, Lamarque  
984 D, Laurent-Puig P, Perret C, Romagnolo B. A genetic study of the role of the  
985 Wnt/beta-catenin signalling in Paneth cell differentiation. *Dev Biol*  
986 2008;324(2):288-96.
- 987 [77] Papetti M, Augenlicht LH. MYBL2, a link between proliferation and differentiation  
988 in maturing colon epithelial cells. *J Cell Physiol* 2011;226(3):785-91.
- 989 [78] Gaudier E, Jarry A, Blottiere HM, de Coppet P, Buisine MP, Aubert JP, Laboisie  
990 C, Cherbut C, Hoebler C. Butyrate specifically modulates MUC gene expression  
991 in intestinal epithelial goblet cells deprived of glucose. *Am J Physiol Gastrointest*  
992 *Liver Physiol* 2004;287(6):G1168-74.
- 993 [79] Adnan H, Quach H, MacIntosh K, Antenos M, Kirby GM. Low levels of GSTA1  
994 expression are required for Caco-2 cell proliferation. *PLoS One*  
995 2012;7(12):e51739.
- 996 [80] Radek KA, Lopez-Garcia B, Hupe M, Niesman IR, Elias PM, Taupenot L, Mahata  
997 SK, O'Connor DT, Gallo RL. The neuroendocrine peptide catestatin is a  
998 cutaneous antimicrobial and induced in the skin after injury. *J Invest Dermatol*  
999 2008;128(6):1525-34.
- 1000 [81] Croitoru-Lamoury J, Lamoury FM, Caristo M, Suzuki K, Walker D, Takikawa O,  
1001 Taylor R, Brew BJ. Interferon-gamma regulates the proliferation and  
1002 differentiation of mesenchymal stem cells via activation of indoleamine 2,3  
1003 dioxygenase (IDO). *PLoS One* 2011;6(2):e14698.
- 1004  
1005



1006 **Tables**

1007

1008 **Table 1: Antibodies used in this work**

| Antibody Type | Target                               | Species    | Company           | Cat#       | Dilution |
|---------------|--------------------------------------|------------|-------------------|------------|----------|
| Primary       | Muc2                                 | Mouse      | Santa Cruz        | sc-515032  | 1:200    |
| Primary       | Sucrase Isomaltase                   | Mouse      | Santa Cruz        | sc-393470  | 1:100    |
| Primary       | Sodium-glucose transporter 1/ SLC5A1 | Rabbit     | Novus Biologicals | NBP-238748 | 1:100    |
| Primary       | Chromogranin A                       | Rabbit     | Novus Biologicals | NBP-253140 | 1:500    |
| Primary       | Serotonin                            | Goat       | Immunostar        | 20079      | 1:500    |
| Primary       | Phospho-Ezrin                        | Rabbit     | Cell Signaling    | 3726S      | 1:200    |
| Primary       | Rotavirus NSP2                       | Guinea Pig | [74]              |            | 1:500    |
| Secondary     | Anti-goat Alexa Fluor 488            | Donkey     | Life Technologies | A11055     | 1:1,000  |
| Secondary     | Anti-rabbit Alexa Fluor 488          | Donkey     | Life Technologies | R37116     | 1:2,000  |
| Secondary     | Anti-rabbit Alexa Fluor 555          | Donkey     | Life Technologies | A31572     | 1:1,000  |
| Secondary     | Anti-guinea pig Alexa Fluor 568      | Goat       | Life Technologies | A11075     | 1:1,000  |
| Secondary     | Anti-mouse Alexa Fluor 568           | Goat       | Life Technologies | A11004     | 1:2,000  |

1009

1010

1011 **Table 2: Primers used in this work**

| Gene        | Forward (5') Sequence  | Reverse (3') Sequence    | Marker of                           | Reference |
|-------------|------------------------|--------------------------|-------------------------------------|-----------|
| <i>18S</i>  | GATATGCTCATGTGGTGTTG   | AATCTTCTTCAGTCGCTCCA     | Housekeeping                        | [75]      |
| <i>LYZ</i>  | AAAACCCCAGGAGCAGTTAAT  | CAACCCTCTTTCACAAAGCT     | Paneth Cell                         | [76]      |
| <i>LGR5</i> | CTCCAGGTCTGGTGTGTTG    | GAGGTCTAGGTAGGAGGTGAAG   | Stem Cell                           | [77]      |
| <i>MUC2</i> | CTGCACCAAGACCGTCCTCATG | GCAAGGACTGAACAAAGACTCAGA | Goblet Cell                         | [78]      |
| <i>VIL1</i> | AGCCAGATCACTGCTGAGGT   | TGGACAGGTGTTCCCTCCTTC    | Enterocyte                          | [79]      |
| <i>CHGA</i> | TGTAGTGCTGAACCCCACC    | CTCTCGCCTTTCGGATCT       | Enteroendocrine                     | [80]      |
| <i>NGN3</i> | AGTTGGCACTGAGCAAGC     | AGTGCCGAGTTGAGGTTG       | Enteroendocrine                     | [67]      |
| <i>TPH1</i> | TGGCTGAACCTAGTTTTGCC   | CCAAAGACTCTTAGCTGTCCATC  | Enteroendocrine Serotonin synthesis | [81]      |

1012

1013

1014 **Table 3: Fold Changes in *NGN3* and *CHGA* Expression with Doxycycline Treatment**

| tetNGN3-HIE format   | <i>NGN3</i>   |             | <i>CHGA</i>   |             |
|----------------------|---------------|-------------|---------------|-------------|
|                      | 0.1 µg/mL dox | 1 µg/mL dox | 0.1 µg/mL dox | 1 µg/mL dox |
| 3D cultures          | 1.5           | 143         | 14            | 239         |
| Flat monolayers      | 12            | 141         | 54            | 316         |
| Transwell monolayers | 300           | 436         | 326           | 445         |

1015

1016 **Table 4:** RNA-seq Analysis of Fold Changes in Gene Expression with Doxycycline  
 1017 Treatment

| Gene Symbol    | Gene Name                                                        | Marker of                   | Fold change FPKM | SD       | Log <sub>2</sub> fold change FPKM | SD    |
|----------------|------------------------------------------------------------------|-----------------------------|------------------|----------|-----------------------------------|-------|
| <i>LGR5</i>    | Leucine-rich repeat containing G protein coupled receptor 5      | Stem cells                  | 0.94             | 0.50     | -0.28                             | 0.842 |
| <i>WNT3a</i>   | Wnt family member 3A                                             | Stem cells                  | 0.81             | 0.39     | -0.53                             | 0.993 |
| <i>SOX9</i>    | SRY-Box 9                                                        | Stem cells                  | 0.68             | 0.12     | -0.58                             | 0.267 |
| <i>CDH1</i>    | Cadherin 1                                                       | Tight Junctions             | 0.93             | 0.08     | -0.10                             | 0.122 |
| <i>CDH2</i>    | Cadherin 2                                                       | Tight Junctions             | 4.80             | 4.09     | 1.12                              | 2.303 |
| <i>CDH3</i>    | Cadherin 3                                                       | Tight Junctions             | 1.12             | 0.23     | 0.14                              | 0.285 |
| <i>CLDN1</i>   | Claudin1                                                         | Tight Junctions             | 1.43             | 0.29     | 0.49                              | 0.302 |
| <i>CLDN2</i>   | Claudin 2                                                        | Tight Junctions             | 1.14             | 0.47     | 0.09                              | 0.552 |
| <i>TJP1</i>    | Tight junction protein 1                                         | Tight Junctions             | 1.03             | 0.08     | 0.03                              | 0.114 |
| <i>TJP2</i>    | Tight junction protein 2                                         | Tight Junctions             | 0.79             | 0.08     | -0.35                             | 0.143 |
| <i>TJP3</i>    | Tight junction protein 3                                         | Tight Junctions             | 0.55             | 0.07     | -0.88                             | 0.159 |
| <i>NHE3</i>    | Solute carrier family 9 member A3                                | Enterocytes                 | 0.61             | 0.19     | -0.78                             | 0.443 |
| <i>ALPI</i>    | Alkaline phosphatase                                             | Enterocytes                 | 0.27             | 0.13     | -2.09                             | 0.818 |
| <i>SI</i>      | Sucrose isomaltase                                               | Enterocytes                 | 0.29             | 0.25     | -2.46                             | 1.697 |
| <i>SGLT</i>    | Solute carrier family 5 member 1                                 | Enterocytes                 | 0.27             | 0.14     | -2.07                             | 0.837 |
| <i>VIL1</i>    | Villin                                                           | Enterocytes                 | 0.57             | 0.04     | -0.82                             | 0.106 |
| <i>KRT20</i>   | Keratin 20                                                       | Enterocytes                 | 0.41             | 0.17     | -1.39                             | 0.635 |
| <i>FABP2</i>   | Fatty acid binding protein 2                                     | Enterocytes                 | 0.25             | 0.14     | -2.18                             | 0.882 |
| <i>MUC2</i>    | Mucin 2                                                          | Goblet cells                | 1.13             | 0.35     | 0.12                              | 0.445 |
| <i>TFF3</i>    | Trefoil factor 3                                                 | Goblet cells                | 1.04             | 0.17     | 0.04                              | 0.239 |
| <i>KLF4</i>    | Kruppel-like factor 4                                            | Goblet cells                | 0.57             | 0.09     | -0.83                             | 0.238 |
| <i>AGR2</i>    | Anterior gradient 2                                              | Goblet cells                | 1.74             | 0.24     | 0.79                              | 0.196 |
| <i>SPDEF</i>   | SAM pointed domain containing ETS transcription factor           | Goblet cells                | 4.66             | 1.38     | 2.16                              | 0.462 |
| <i>LYZ</i>     | Lysozyme                                                         | Paneth cells                | 0.94             | 0.12     | -0.10                             | 0.178 |
| <i>MMP7</i>    | Matrix metalloproteinase 7                                       | Paneth cells                | 1.53             | 1.46     | -0.08                             | 1.676 |
| <i>DCLK1</i>   | Double cortin like kinase 1                                      | Tuft cells                  | 1.52             | 0.82     | 0.45                              | 0.687 |
| <i>HPGD</i>    | 15-hydroxyprostaglandin dehydrogenase                            | Tuft cells                  | 0.33             | 0.21     | -1.88                             | 0.981 |
| <i>TRPM5</i>   | Transient receptor potential cation channel subfamily M member 5 | Tuft cells                  | 1.01             | 0.40     | -0.08                             | 0.593 |
| <i>POU2F3</i>  | POU class 2 homeobox 3                                           | Tuft cells                  | 0.40             | 0.19     | -1.45                             | 0.675 |
| <i>NGN3</i>    | Neurogenin-3                                                     | Enteroendocrine             | 428.67           | 141.38   | 8.68                              | 0.494 |
| <i>CHGA</i>    | Chromogranin A                                                   | Enteroendocrine             | 17779.46         | 23032.47 | 13.29                             | 1.63  |
| <i>TPH1</i>    | Tryptophan hydroxylase 1                                         | Enteroendocrine             | 3054.77          | 251.17   | 11.17                             | 1.25  |
| <i>PAX6</i>    | Paired Box 6                                                     | Enteroendocrine             | 75.60            | 43.61    | 5.97                              | 0.96  |
| <i>NEUROD1</i> | Neuronal differentiation 1                                       | Enteroendocrine             | 5073.90          | 2738.32  | 11.83                             | 1.39  |
| <i>GIP</i>     | Gastric inhibitory polypeptide                                   | Enteroendocrine – subtype K | 6926.92          | 3346.00  | 11.26                             | 2.63  |

|             |                         |                                |           |          |       |       |
|-------------|-------------------------|--------------------------------|-----------|----------|-------|-------|
| <i>GHRL</i> | Ghrelin prepropeptide   | Enteroendocrine<br>– subtype K | 1576.15   | 1351.91  | 10.33 | 0.90  |
| <i>SST</i>  | Somatostatin            | Enteroendocrine<br>– subtype D | 6733.26   | 3495.26  | 10.93 | 2.62  |
| <i>PAX4</i> | Paired Box 4            | Enteroendocrine<br>– subtype D | 3468.87   | 1504.07  | 11.32 | 1.22  |
| <i>GLP1</i> | Glucagon-like peptide 1 | Enteroendocrine<br>– subtype L | 15.62     | 11.63    | 3.54  | 1.13  |
| <i>PYY</i>  | Peptide YY              | Enteroendocrine<br>– subtype L | 5.65      | 2.68     | 1.73  | 0.646 |
| <i>GAST</i> | Gastrin                 | Enteroendocrine<br>– subtype G | 46.49     | 35.50    | 4.53  | 2.04  |
| <i>SCT</i>  | Secretin                | Enteroendocrine<br>– subtype S | 7.37      | 3.617    | 2.301 | 1.47  |
| <i>CCK</i>  | Cholecystokinin         | Enteroendocrine<br>– subtype I | 39.66     | 26.75    | 4.57  | 1.88  |
| <i>MLN</i>  | Motilin                 | Enteroendocrine<br>– subtype M | 146280.01 | 22926.82 | 13.55 | 4.13  |

1018

1019 **Figures**

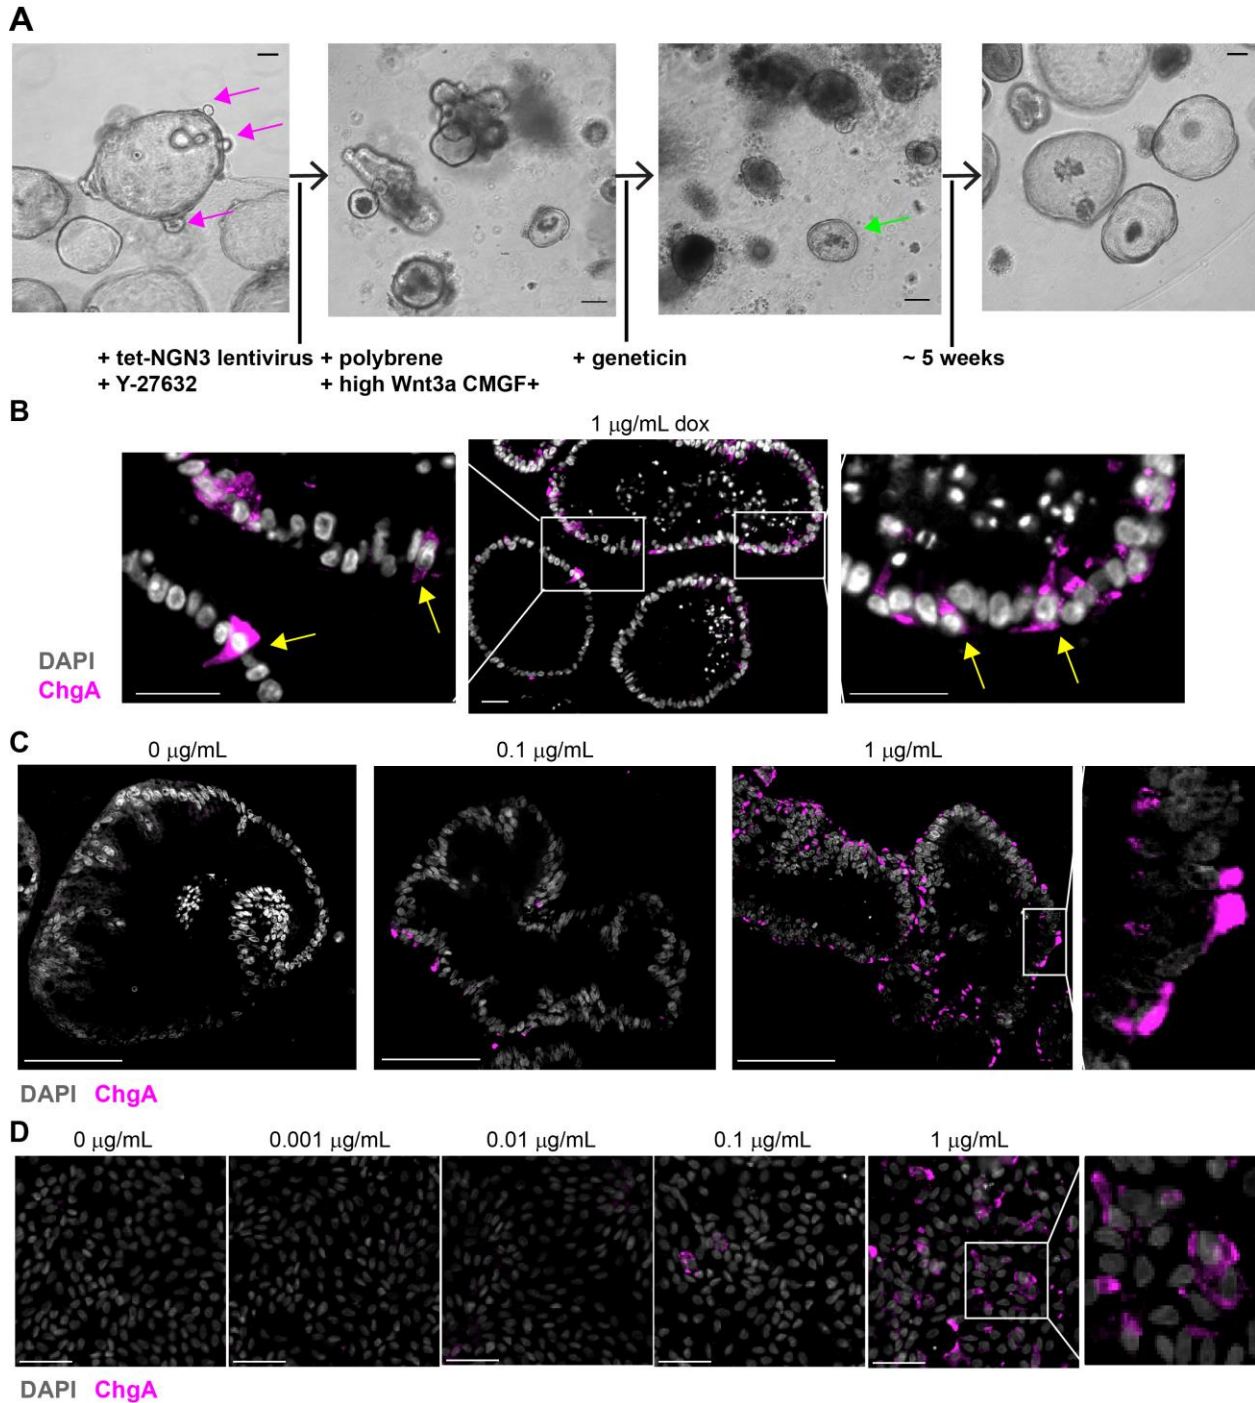

1020  
1021  
1022  
1023  
1024  
1025  
1026

**Figure 1: (A)** Production pipeline for creating tetNGN3-HIEs using lentivirus transduction. Jejunum HIEs grown in high Wnt CMGF+ media increases stem cells, evidenced by cysts and crypt buds (pink arrows), followed by inoculation with lentivirus. Reseeding the HIEs in Matrigel is followed by geneticin selection for approximately 5 weeks, so that only HIEs with tetNGN3 construct survive (green arrow) (scale bar =

1027 100 $\mu$ m). Images were acquired using a 10X Plan Fluor (NA 0.3) phase contrast  
1028 objective on an inverted Nikon TiE microscope with an ORCA-Flash 4.0 sCMOS  
1029 camera and Nikon Elements software. **(B, C, D)** Doxycycline induces enterochromaffin  
1030 marker chromogranin A (ChgA) expression in tet*NGN3*-HIEs. Tet*NGN3*-HIEs were fixed  
1031 and stained for ChgA (Alexa Fluor 488 [pink]) to mark enterochromaffin cells and  
1032 counterstained with DAPI (gray). **(B)** 3D tet*NGN3*-HIEs were differentiated for 4 days  
1033 with 1  $\mu$ g/mL doxycycline (scale bars = 25  $\mu$ m). ChgA-positive cells (inset) were  
1034 observed (yellow arrows). **(C, D)** tet*NGN3*-HIEs as **(C)** 3D cultures and **(D)** flat  
1035 monolayers were differentiated for 4 days with 0, 0.1, and 1  $\mu$ g/mL doxycycline and also  
1036 0.01 and 0.001  $\mu$ g/mL doxycycline in flat monolayers. 3D culture images were acquired  
1037 using a 20X Plan Apo (NA 0.75) DIC objective on an upright Nikon Eclipse 90i  
1038 microscope with a Photometrics CoolSNAP HQ2 camera and Nikon Elements software  
1039 (scale bar = 100  $\mu$ m). Flat monolayer images were acquired using a 20X Plan Apo (NA  
1040 0.75) DIC objective on an inverted Nikon TiE microscope with an ORCA-Flash 4.0  
1041 sCMOS camera and Nikon Elements software (scale bar = 50  $\mu$ m).

1042

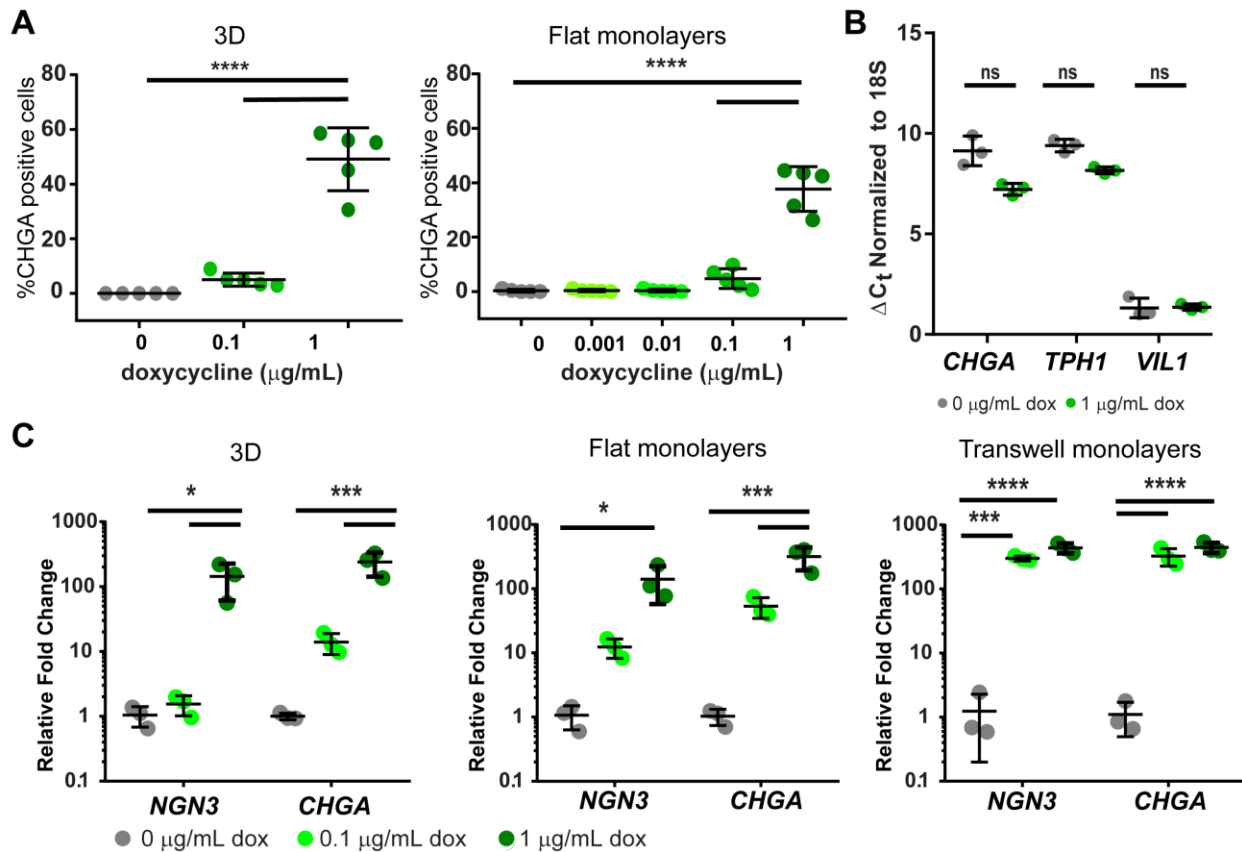

1043

1044

1045

1046

1047

1048

1049

1050

1051

1052

1053

1054

1055

1056

1057

**Figure 2:** Doxycycline induces enteroendocrine cell lineage in tetNGN3-HIEs. **(A)** Increased doxycycline concentration increases the percentage of ChgA-positive cells in differentiated tetNGN3-HIE 3D cultures and flat monolayers. Images were analyzed with Nikon elements software with 5 images per condition with an average of 220 nuclei per image in 3D cultures and 1400 nuclei per image in flat monolayers. (n = 2 biological replicates) **(B)** qPCR of *CHGA* (chromogranin A), *TPH1* (tryptophan hydrolase-1), and *VIL1* (villin) mRNA transcripts of parental jejunum 3D enteroids were treated with 0 or 1  $\mu\text{g/mL}$  doxycycline and normalized to 18S mRNA. (n = 3 biological replicates) **(C)** qPCR of *NGN3* and *CHGA* mRNA transcripts normalized to 18S mRNA transcripts in tetNGN3 3D cultures, flat monolayers, and transwell monolayers. (n = 3 biological replicates) (ns, not significant, \* $p < 0.05$ , \*\*\* $p < 0.001$ , \*\*\*\* $p < 0.0001$ ).

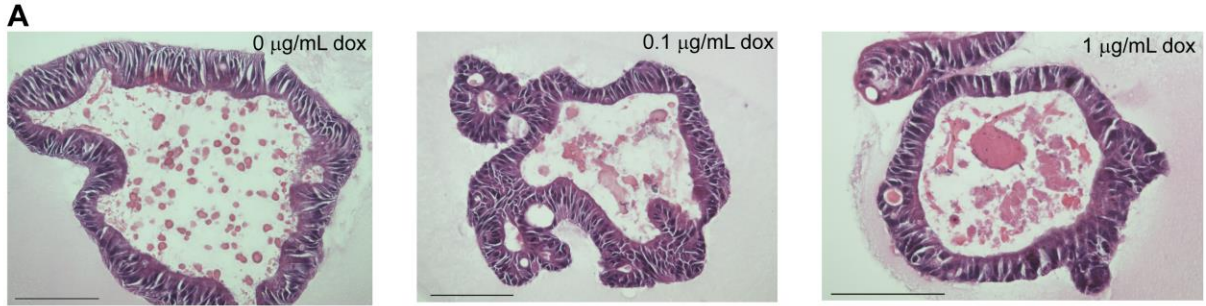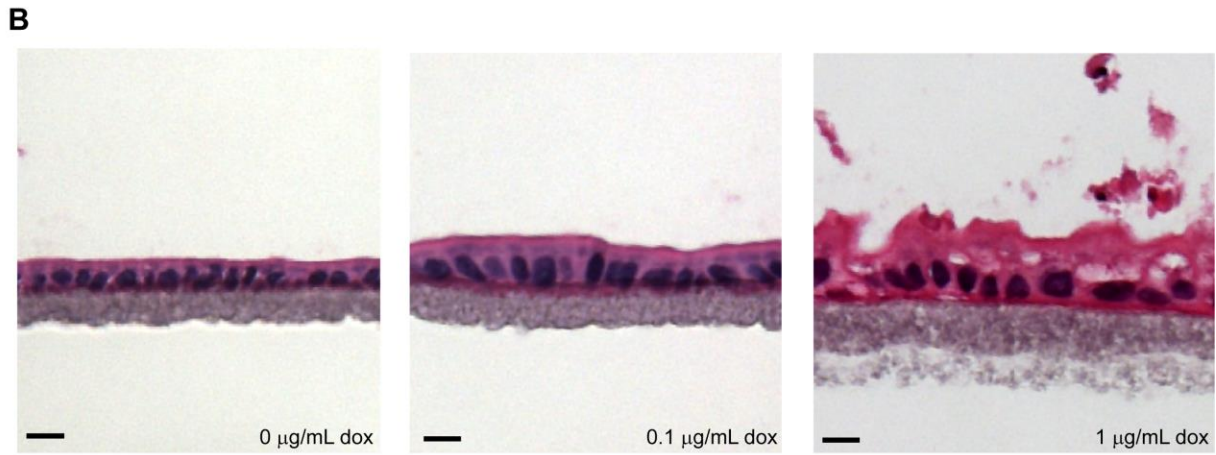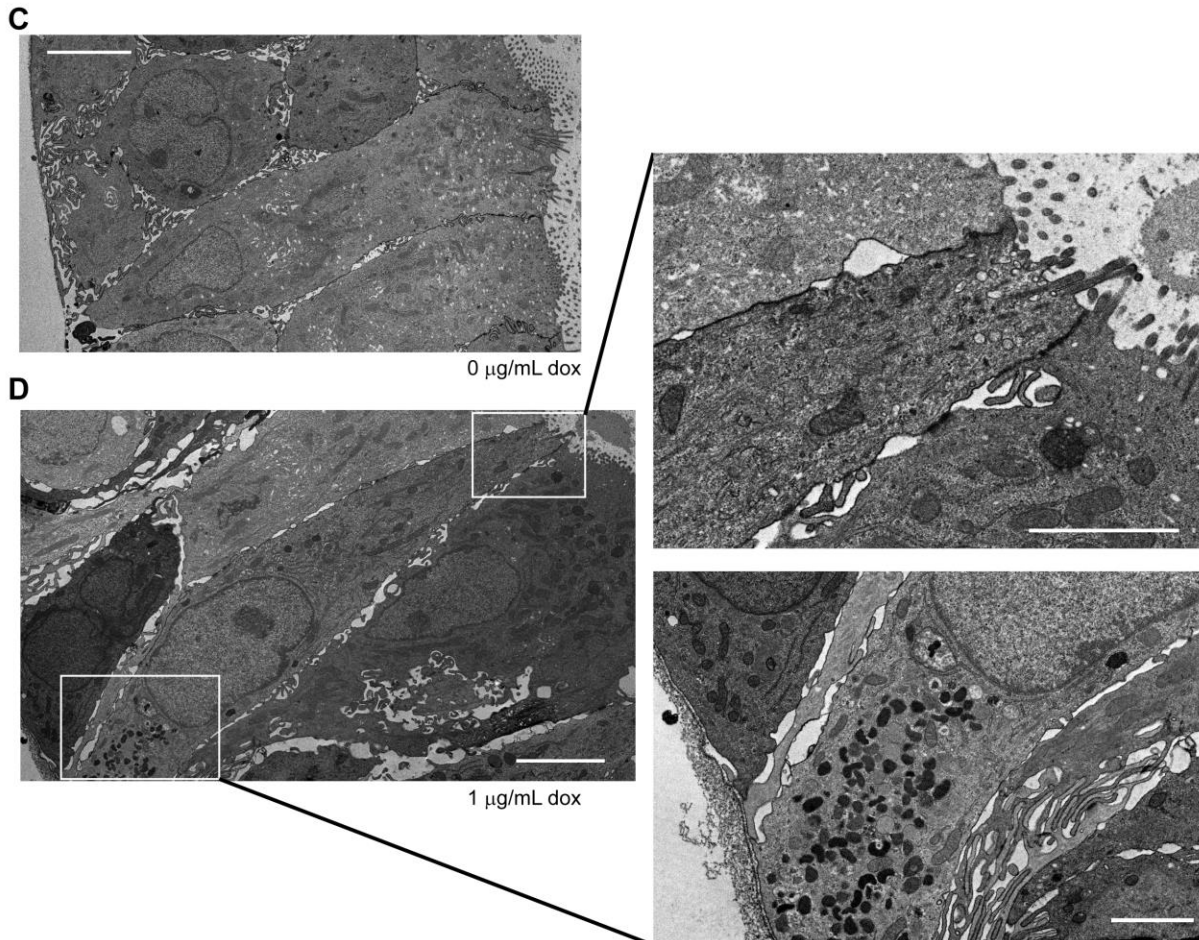

1059 **Figure 3:** *tetNGN3*-HIEs maintain cellular morphology in culture. Hematoxylin and eosin  
1060 (H&E) stained **(A)** three-dimensional (scale bar = 100 $\mu$ m) and **(B)** transwell monolayer  
1061 (scale bar = 10 $\mu$ m) *tetNGN3*-HIEs treated with 0, 0.1, or 1  $\mu$ g/mL doxycycline. Images  
1062 were acquired using a 20X Plan Apo (NA 0.75) DIC objective on an upright Nikon  
1063 Eclipse 90i microscope with a DS-Fi1-U2 camera and Nikon Elements software.  
1064 Transmission electron micrographs (TEM) H&E of three-dimensional *tetNGN3*-HIEs  
1065 with **(C)** 0  $\mu$ g/mL (scale bar = 4 $\mu$ m, 1500x magnification) or **(D)** 1  $\mu$ g/mL doxycycline (left  
1066 scale bars = 4 $\mu$ m, 1500x magnification, right scale bars = 2 $\mu$ m, 3000x magnification).  
1067 TEM sections were viewed on a Hitachi H7500 transmission electron microscope set to  
1068 80kV and collected using an AMT XR-16 digital camera and AMT Image Capture,  
1069 v602.600.51 software.



1070

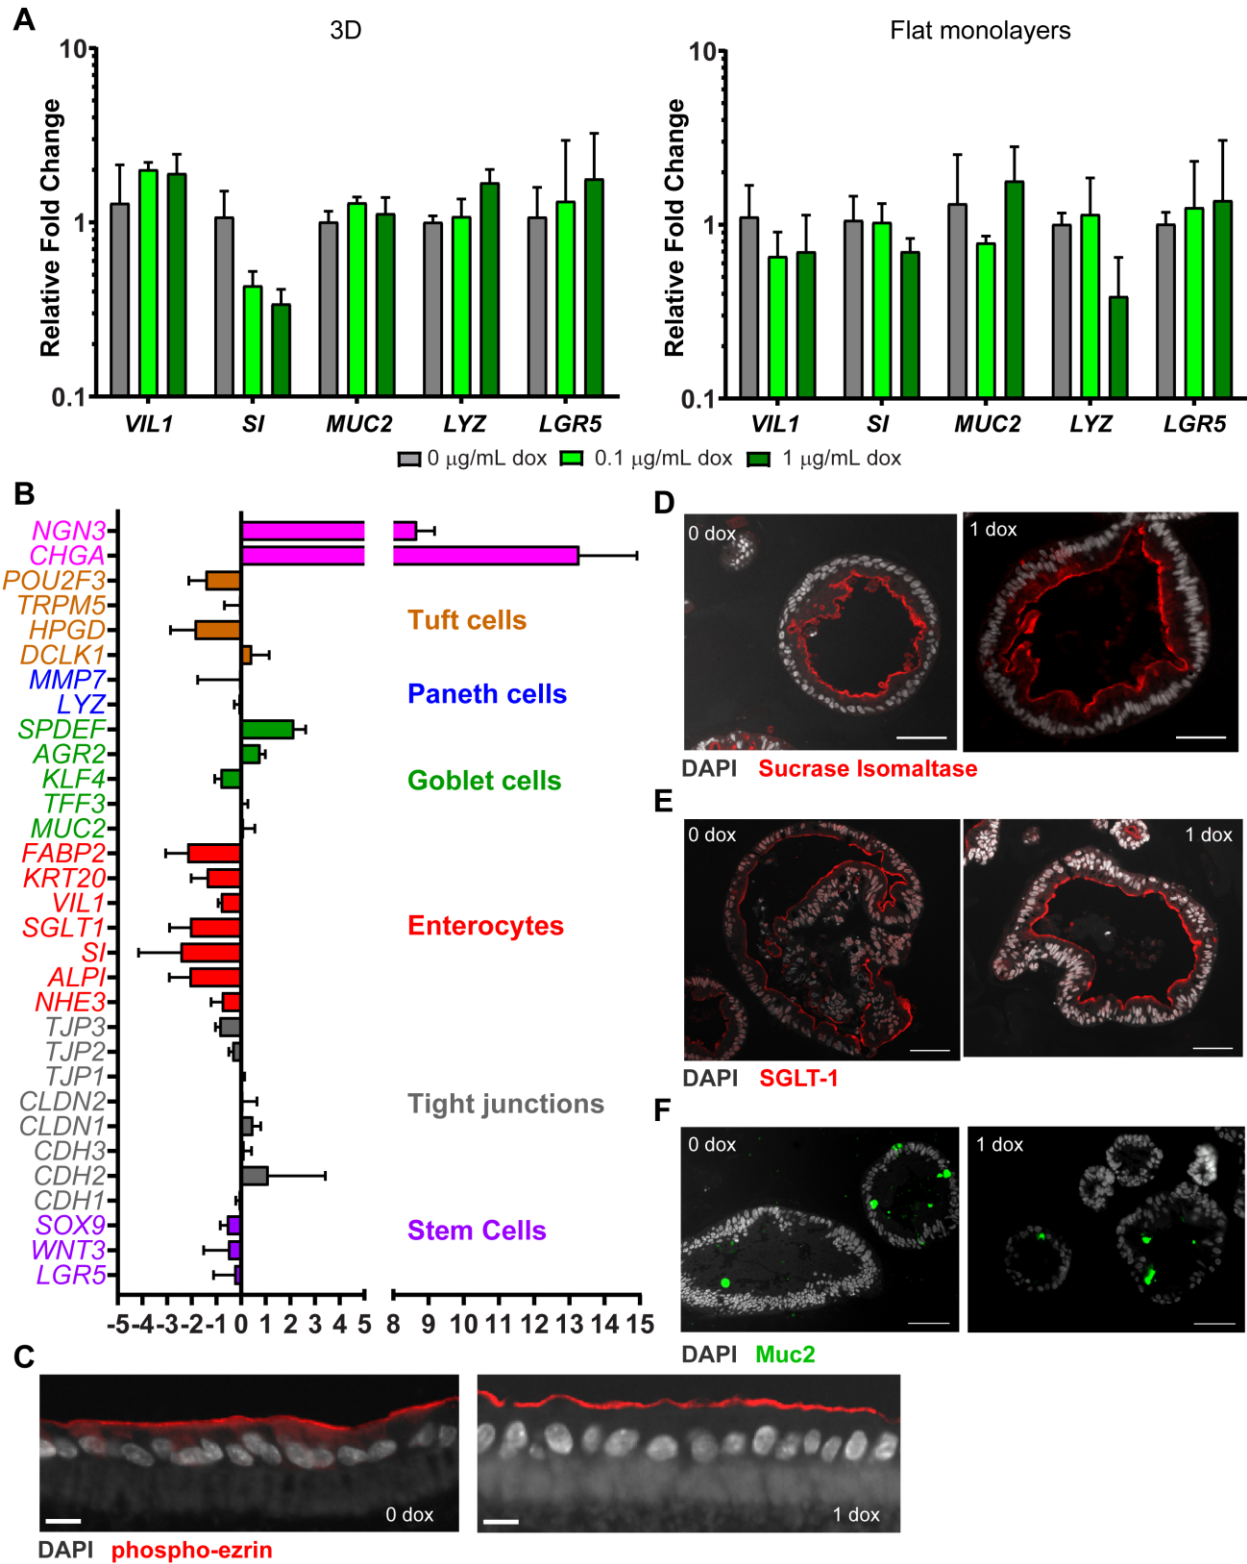

1071

1072 **Figure 4:** Characterization of epithelial cell types in doxycycline-induced tetNGN3-HIEs.

1073 (A) qPCR of cell marker mRNA transcripts normalized to 18S mRNA transcripts in

1074 tet*NGN3*-HIE 3D cultures and flat monolayers (n = 3 biological replicates) **(B)** Log<sub>2</sub> fold  
1075 expression of FPKM (fragments per kilobase of transcript per million mapped reads)  
1076 values from RNA-seq analysis. Transwell monolayers **(C)** and 3D cultures **(D-F)** were  
1077 treated with 0 or 1 µg/mL doxycycline and fixed and stained. IF staining for phospho-  
1078 ezrin (Alexa Fluor 555 [red]) **(C)**, sucrase isomaltase (Alexa Fluor 555 [red]) **(D)**, and  
1079 sodium-glucose transporter 1 (Alexa Fluor 555 [red]) **(E)** to mark the apical border and  
1080 **(F)** for muc2 (Alexa Fluor 488 [green]) to mark goblet cells and counterstained with  
1081 DAPI (blue). Images were acquired using a 20X Plan Apo (NA 0.75) DIC objective on  
1082 an upright Nikon Eclipse 90i microscope with a Photometrics CoolSNAP HQ2 camera  
1083 and Nikon Elements software. **(C)** scale bar = 10µm, **D-F** scale bar = 50µm)

1084

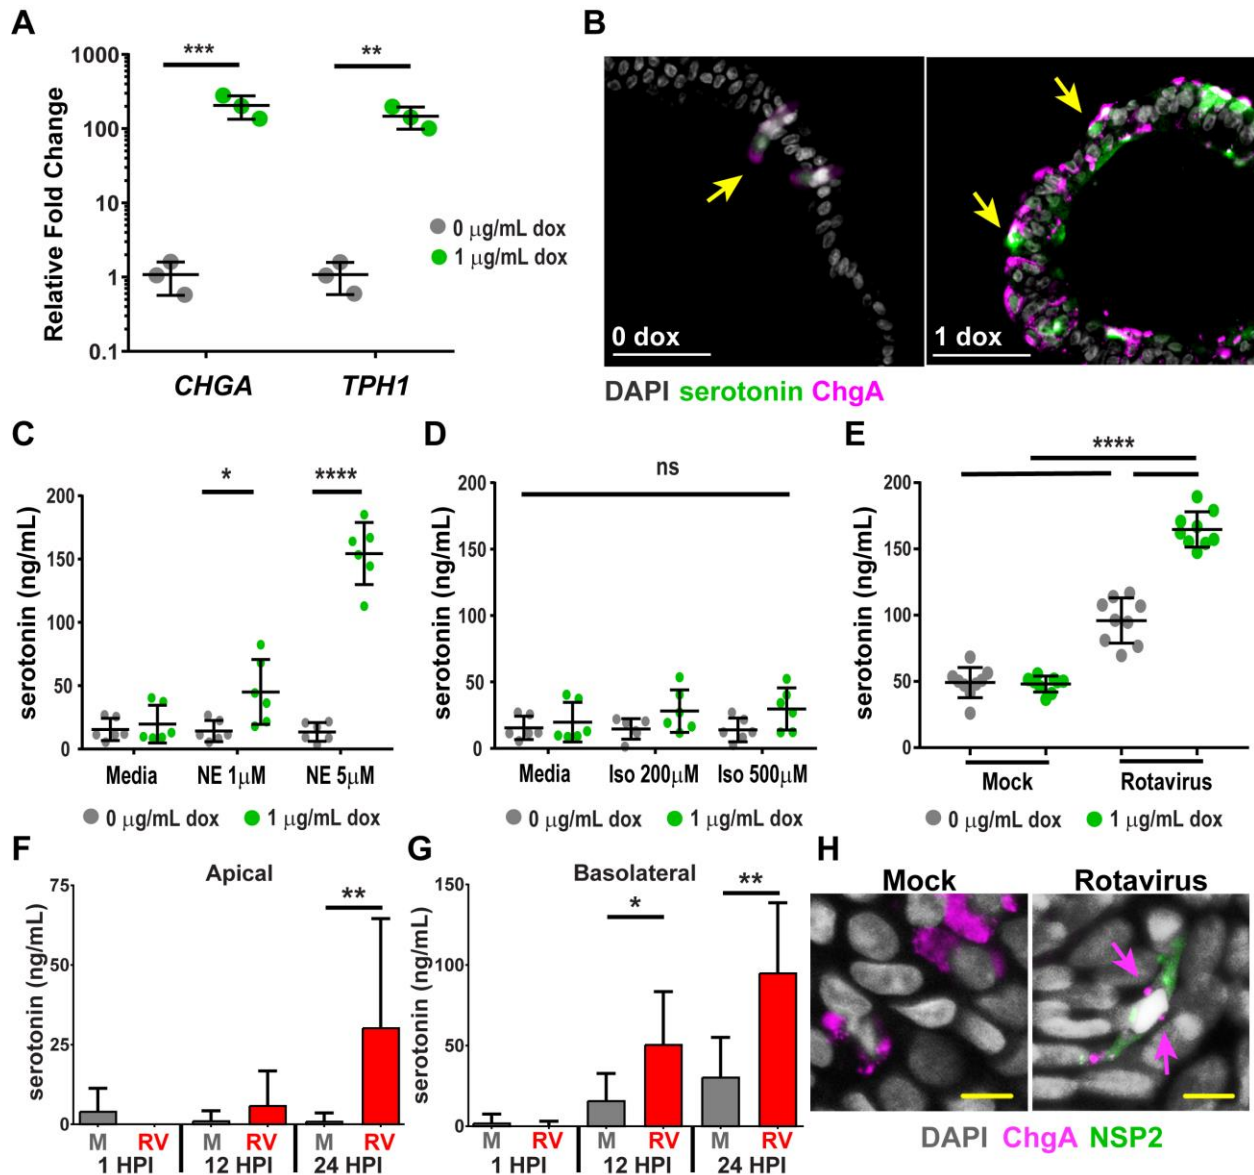

1085

1086 **Figure 5:** tetNGN3-HIEs produce serotonin in response to physiological stimuli. (A)  
 1087 qPCR of chromogranin A (*CHGA*) and tryptophan hydroxylase-1 (*TPH1*) mRNA  
 1088 transcripts normalized to 18S mRNA transcripts. (n = 3 biological replicates) (B) 3D  
 1089 tetNGN3-HIEs were treated with 0 or 1  $\mu\text{g/mL}$  doxycycline (dox) and fixed and  
 1090 immunostained for chromogranin A (ChgA, Alexa Fluor 555 [pink]) and serotonin (Alexa  
 1091 Fluor 488 [green]) and counterstained with DAPI (gray). Some cells are double-positive  
 1092 for ChgA and serotonin (yellow arrows). Images were acquired using a 20X Plan Apo  
 1093 (NA 0.75) DIC objective on an upright Nikon Eclipse 90i microscope with a Photometrics  
 1094 CoolSNAP HQ2 camera and Nikon Elements software (scale bar = 50  $\mu\text{m}$ ) (C-E)  
 1095 tetNGN3-HIE flat monolayers were induced with 0 or 1  $\mu\text{g/mL}$  do). Serotonin release as  
 1096 measured by ELISA: (C) after 2 hr treatment with norepinephrine (NE) (n = 2 biological  
 1097 replicates), (D) after 2 hr treatment with isovalerate (Iso) (n = 2 biological  
 1098 replicates), and (E) after 24 hpi with rotavirus (n = 3 biological replicates) (F-G) tetNGN3-HIE

1099 transwell monolayers were differentiated for 5 days with 0.1 µg/mL doxycycline and  
1100 mock or rotavirus (RV)-infected. Serotonin release measured by ELISA from apical **(F)**  
1101 or basal **(G)** transwell compartments. **(H)** Max intensity projection images of confocal Z-  
1102 stack of transwell monolayers fixed and stained for rotavirus nonstructural protein 2  
1103 (NSP2) (Alexa Fluor 488 [green]) and ChgA (Alexa Fluor 568 [pink], arrows) and  
1104 counterstained with DAPI (gray) using a Plan Apo VC 60x Oil DIC objective on a Nikon  
1105 A1plus point scanning confocal microscope. (scale bar = 10µm; \*p<0.05,  
1106 \*\*p<0.01, \*\*\*p<0.001, \*\*\*\*p<0.0001).  
1107  
1108

1109

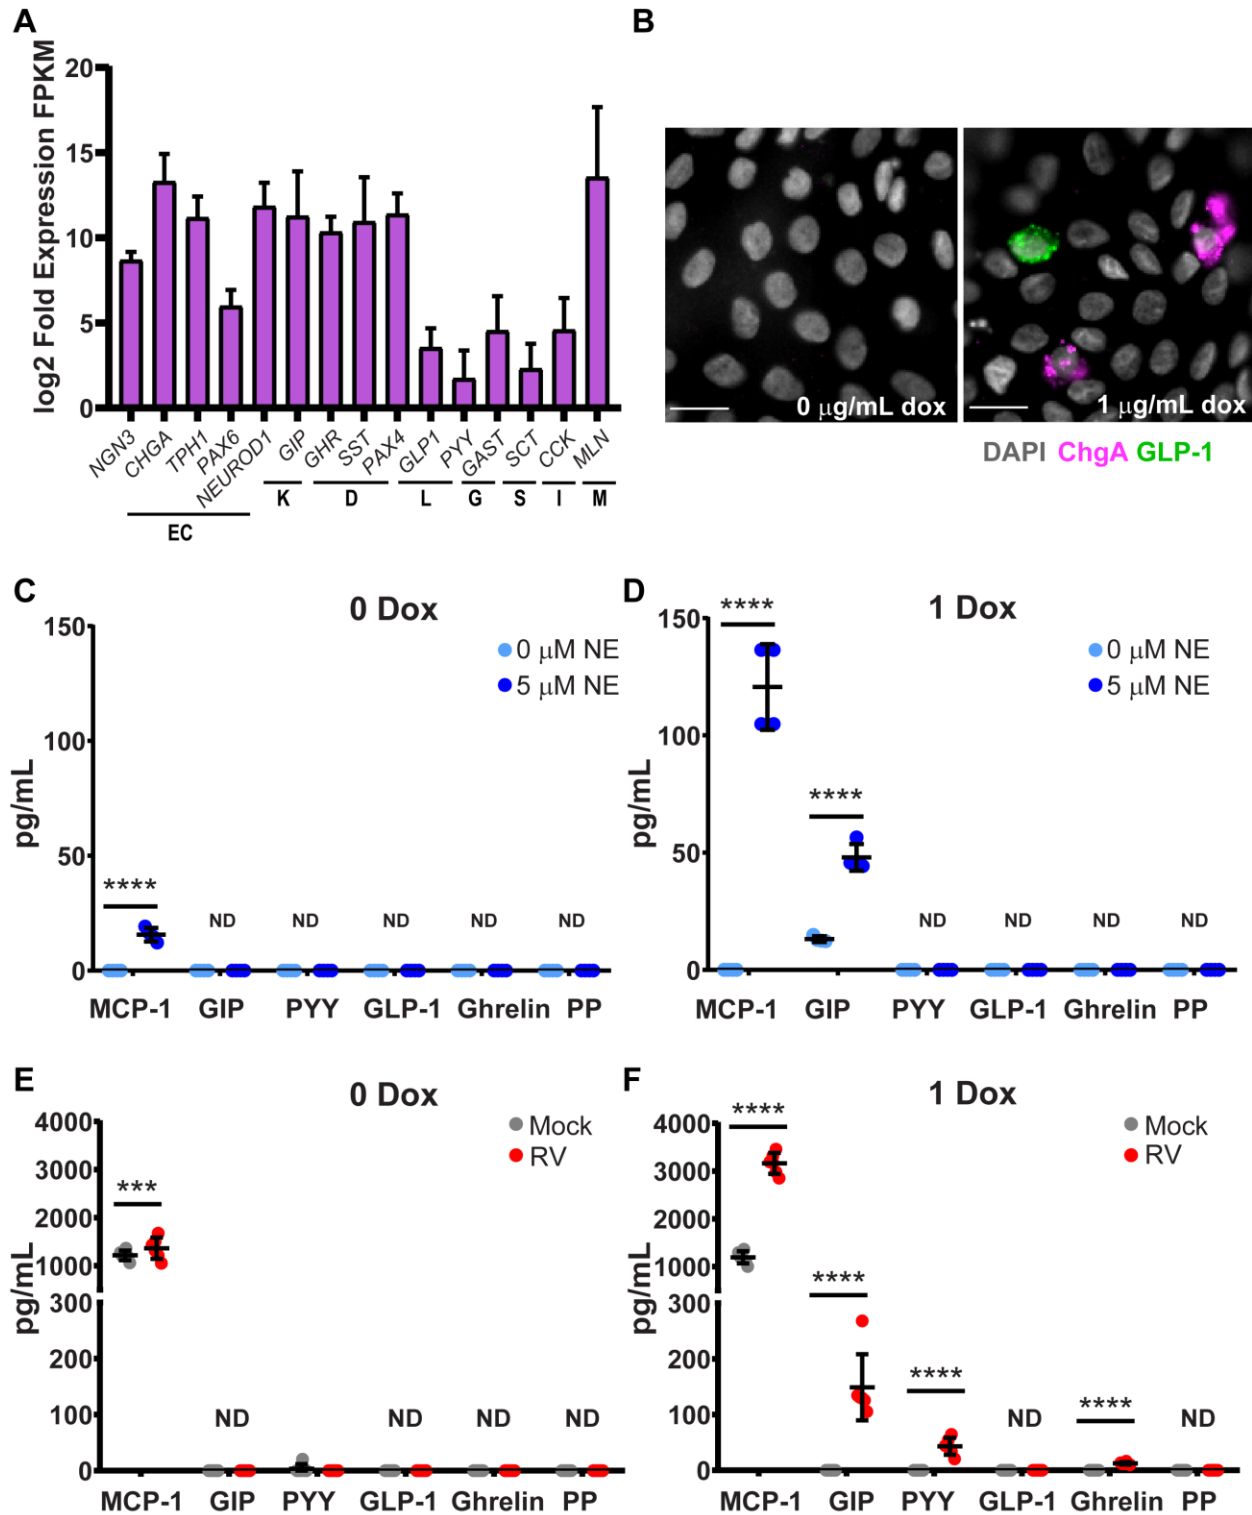

1110  
1111 **Figure 6:** tetNGN3-HIEs differentiate into other EEC types. **(A)** Log<sub>2</sub> fold expression of  
1112 FPKM (fragments per kilobase of transcript per million mapped reads) values from  
1113 RNA-seq. **(B)** Images of monolayers fixed and stained for chromogranin A (ChgA)

1114 (Alexa Fluor 488 [pink]) and glucagon-like peptide-1 (GLP-1) (Alexa Fluor 568 [green])  
1115 counterstained with DAPI (gray). Images were acquired using a 40X Apo (NA 1.15) DIC  
1116 water objective on an inverted Nikon TiE microscope with an ORCA-Flash 4.0 sCMOS  
1117 camera and Nikon Elements software. Supernatants from tet*NGN3*-HIEs were induced  
1118 with 0 µg/mL doxycycline (dox) **(C,E)** or 1 µg/mL dox **(D,F)** and collected after **(C,D)** 2 hr  
1119 stimulation with norepinephrine (NE) (n = 2 biological replicates) or **(E,F)** 24 hpi with  
1120 rotavirus (RV) (n = 3 biological replicates) and secreted products quantitated by  
1121 Luminex [monocyte chemoattractant protein-1 (MCP-1), glucose-dependent  
1122 insulinotropic peptide (GIP), peptide YY (PYY), glucagon-like peptide-1 (GLP-1),  
1123 pancreatic polypeptide (PP)]. (scale bar = 20µm, \*\*\*p<0.001, \*\*\*\*p<0.0001)

1124  
1125  
1126

### Graphical Abstract

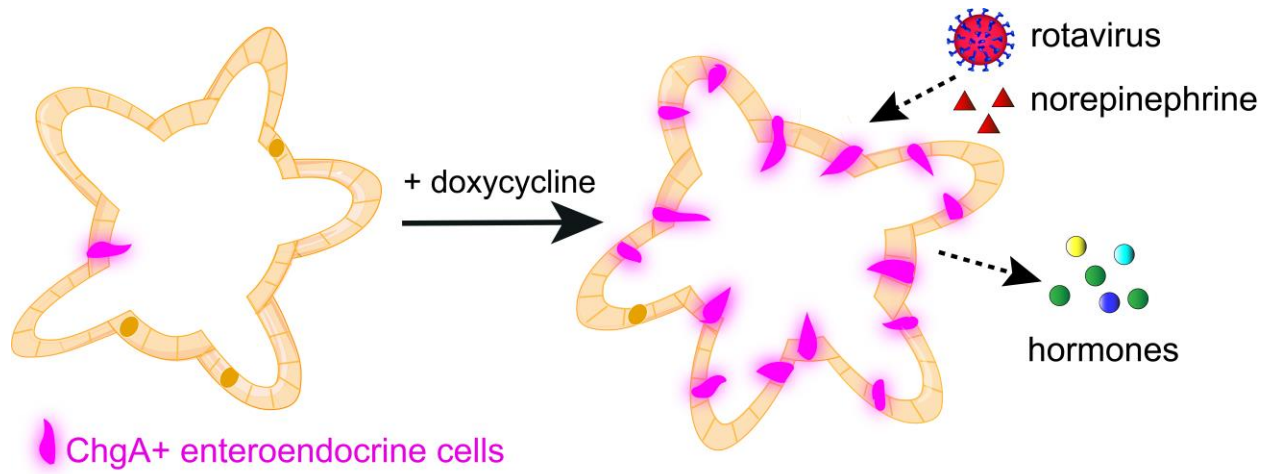

1127
